1 **TCF12 controls oligodendroglial cell proliferation and regulates signaling**  
2 **pathways conserved in gliomas**

3

4

5 **Running title:** TCF12 function in oligodendroglial cells and in gliomas

6

7

8 Sofia Archontidi<sup>1</sup>, Corentine Marie<sup>1</sup>, Beata Gyorgy<sup>1\*</sup>, Justine Guegan<sup>1\*</sup>, Marc Sanson<sup>1</sup>,  
9 Carlos Parras<sup>1</sup> and Emmanuelle Huillard<sup>1#</sup>

10 <sup>1</sup>Sorbonne Université, Institut du Cerveau - Paris Brain Institute - ICM, Inserm, CNRS,  
11 APHP, Hôpital de la Pitié Salpêtrière, Paris, France

12

13 \* These authors contributed equally

14 # Author for correspondence; [emmanuelle.huillard@icm-institute.org](mailto:emmanuelle.huillard@icm-institute.org)

15 The authors declare no conflicts of interest

16

17

18 **Acknowledgements:**

19 We acknowledge funding from Ligue Nationale contre le Cancer (to MS), Fondation  
20 ARC (PJA 20151203259 to EH), National Multiple Sclerosis Society (NMSS RG-1501-  
21 02851 to CP), and the Fondation pour l'Aide à la Recherche sur la Sclérose en Plaques  
22 (ARSEP 2015, 2018, 2019 to CP), Fondation pour la Recherche Médicale (to CP). SA  
23 is recipient of scholarships from Ligue Nationale Contre le Cancer and Fondation pour  
24 la Recherche Médicale. We acknowledge the contribution of SiRIC CURAMUS (INCA-  
25 DGOS-Inserm\_12560) which is financially supported by the French National Cancer  
26 Institute, the French Ministry of Solidarity and Health and Inserm. The research leading  
27 to these results has received funding from the program "Investissements d'avenir"  
28 ANR-10- IAIHU-06. Part of this work was carried out on the iGenSeq, CELIS,  
29 Histomics, PHENOPARC, Icm.Quant and Data and Analysis core facilities of ICM. We  
30 gratefully acknowledge Yannick Marie for assistance on RNA sequencing. We thank  
31 Isabelle Le Roux for critical input and reading of the manuscript.

32

33

34

35

36

37

38

39

40

## 41 **Abstract**

42 Diffuse gliomas are primary brain tumors originating from the transformation of glial  
43 cells. In particular, oligodendrocyte precursor cells constitute the major tumor-  
44 amplifying population in the gliomagenic process. We previously identified the *TCF12*  
45 gene, encoding a transcription factor of the E protein family, as being recurrently  
46 mutated in oligodendrogliomas. In this study, we sought to understand the function of  
47 TCF12 in oligodendroglial cells, the glioma lineage of origin. We first describe TCF12  
48 mRNA and protein expression pattern in oligodendroglial development in the mouse  
49 brain. Second, by TCF12 genome wide chromatin profiling in oligodendroglial cells, we  
50 show that TCF12 binds active promoters of genes involved in proliferation,  
51 translation/ribosomes, and pathways involved in oligodendrocyte development and  
52 cancer. Finally, we perform OPC-specific *Tcf12* inactivation *in vivo* and demonstrate  
53 by immunofluorescence and transcriptomic analyses that TCF12 is transiently required  
54 for OPC proliferation but dispensable for oligodendrocyte differentiation. We further  
55 show that *Tcf12* inactivation results in deregulation of biological processes that are  
56 also altered in oligodendrogliomas. Together, our data suggest that TCF12 directly  
57 regulates transcriptional programs in oligodendroglia development that are relevant in  
58 a glioma context.

59

60 **Keywords:** TCF12/HEB, oligodendrocyte, glioma, proliferation, chromatin  
61 immunoprecipitation, transcriptomics, mouse model

62

## 63 **Main Text**

### 64 **Introduction**

65 Diffuse gliomas are the most prevalent malignant primary brain tumors in adults  
66 (Ostrom et al., 2017). Gliomas are classified according to their histological and  
67 genomic features, including the presence of mutations in isocitrate dehydrogenase  
68 genes (mostly in *IDH1*) and the status of the loss of the chromosomal arms 1p and 19q  
69 (termed as *1p/19q* co-deletion) (Louis et al., 2016). The three main glioma entities are  
70 oligodendrogliomas (*IDH* mutated, *1p/19q* co-deleted), astrocytomas (*IDH* mutated,  
71 *1p/19q* intact) and glioblastomas (also termed GBM, *IDH* wild type, *1p/19q* intact), with  
72 the latter being most aggressive.

73 Gliomas contain cells with features of glial cells and neural stem/progenitor cells  
74 (NSC/NPCs) that are endowed with proliferative capacity (Bielle et al., 2017; Neftel et  
75 al., 2019; Tirosh et al., 2016). Furthermore, mounting evidence from genetically  
76 engineered mouse models indicate that cells with characteristics of NSC/NPCs, or  
77 oligodendrocyte precursor cells (OPCs) are potential cells of origin and responsible for  
78 tumor amplification in gliomas (Alcantara Llaguno et al., 2009; C. Liu et al., 2011;  
79 Persson et al., 2010; Weng et al., 2019). Thus, deciphering how alterations found in  
80 gliomas impact oligodendroglial lineage cells is critical to understand the cellular and  
81 molecular mechanisms underlying tumor development and progression.

82 In the forebrain, OPCs are generated from NSC/NPCs at both embryonic and  
83 postnatal stages, and after proliferating and populating the brain, they start to  
84 differentiate into myelin-producing oligodendrocytes (OLs) around the second week  
85 after birth (Kessar et al., 2006; Shen et al., 2021). Recent studies have described  
86 oligodendroglial differentiation as a continuum, starting from OPCs, followed  
87 sequentially by committed oligodendrocyte progenitors (COPs), newly formed OLs  
88 (NFOLs), myelin forming OLs (MFOLs) and finally by several populations of mature,  
89 axon ensheathing, OLs (MOLs) (Marques et al., 2016, 2018). OPCs constitute the  
90 major proliferating cell type the adult central nervous system (CNS), acting as source  
91 for differentiated OLs while maintaining the pool of cells available for differentiation  
92 (Dawson et al., 2003). OPC proliferation and differentiation properties are subjected to  
93 a strict, finely tuned regulation by a complex network of signaling, transcription and  
94 epigenetic factors (reviewed in (Parras et al., 2020; Sock & Wegner, 2019).

95 Transcription factor 12 (*TCF12*, also called *HTF4* or *HEB*) is a member the E  
96 protein family, a subclass of the basic helix-loop-helix (bHLH) protein family that  
97 includes TCF3 (E2A) and TCF4 (E2-2) (Massari & Murre, 2000). Functionally, TCF12  
98 has been reported to regulate the differentiation of lymphocytes (Emmanuel et al.,  
99 2018; Jones-Mason et al., 2012; Wojciechowski et al., 2007), the formation of germ  
100 layers from embryonic stem cells (Li et al., 2017; Yi et al., 2020; Yoon et al., 2015),  
101 osteoblast differentiation (Yi et al., 2017) and cranial suture development (Sharma et  
102 al., 2013). In the CNS, TCF12 is implicated in the development of midbrain  
103 dopaminergic neurons (Mesman & Smidt, 2017) but its roles in the oligodendroglial  
104 lineage are not known. Early studies had demonstrated that *TCF12* is expressed in  
105 oligodendrogliomas and astrocytomas (Riemenschneider et al., 2004). Furthermore,  
106 we and others previously reported that *TCF12* is mutated in oligodendrogliomas  
107 (Labreche et al., 2015; Aihara et al., 2017; Suzuki et al., 2015). In particular we found  
108 that *TCF12* mutations resulted in reduced transcriptional activity and were associated  
109 with aggressive tumor features (Labreche et al., 2015). However, how *TCF12*  
110 mutations functionally impact the development of glioma cells of origin are not  
111 understood.

112 In this study, we explored the functions of TCF12 in oligodendroglia and gliomas,  
113 using chromatin binding profiling, transcriptomic and genomic analyses as well as  
114 genetic mouse models of *Tcf12* conditional deletion. We report that TCF12 positively  
115 regulates OPC proliferation *in vivo* and further suggest putative implications that can  
116 be conserved in a glioma context.

117

## 118 **Methods**

### 119 **Mice**

120 Mice were housed, bred and treated in an authorized facility (agreement number  
121 A751319). All protocols and procedures involving mice were ethically reviewed and  
122 approved by the local ethics committee and the French Ministry of Research and  
123 Higher Education (approval number APAFIS#20939-2020052811427837). Swiss

124 (RjOrl:SWISS) mice were obtained from Janvier Laboratories (France). *Tcf12<sup>flox</sup>* mice  
125 (*Tcf12<sup>tm3Zhu</sup> Tcf3<sup>tm4Zhu</sup>/J*; (Wojciechowski et al., 2007)) were obtained from Jackson  
126 Laboratory and maintained as heterozygotes (*Tcf12<sup>flox/wt</sup>*) by crossing them with  
127 C57BL/6J mice (Janvier Laboratories). These mice were bred to *PDGFR $\alpha$ ::CreER<sup>T</sup>*  
128 (Kang et al., 2010) and *Rosa26<sup>LSL-YFP</sup>* (Srinivas et al., 2001) to generate  
129 *PDGFR $\alpha$ ::CreER<sup>T/wt</sup>*; *Rosa26<sup>LSL-YFP/LSL-YFP</sup>*; *Tcf12<sup>flox/wt</sup>* males that were subsequently  
130 bred with *Tcf12<sup>flox/wt</sup>* females. Both male and female animals were used for the  
131 experiments. Genotyping was performed using standard protocols (sequences of  
132 genotyping primers are available upon request). To induce Cre-mediated DNA  
133 recombination, *PDGFR $\alpha$ ::CreER<sup>T</sup>;Rosa26<sup>LSL-YFP</sup>;Tcf12<sup>flox</sup>* mice were injected  
134 subcutaneously with 100 $\mu$ g/g of tamoxifen (T5648, Sigma; dissolved in corn oil; stock  
135 concentration of 20mg/mL) at P13, once a day for three consecutive days.

136

### 137 Immunofluorescence on frozen sections

138 Mice were sedated by xylazine (Rompun, 10-15mg/kg) and euthanized by  
139 intraperitoneal injection of sodium pentobarbital (Euthasol, 140mg /Kg). Mice were  
140 intracardially perfused with NaCl 0.9% followed by PFA 2% (Electron Microscopy  
141 Sciences 15713, diluted in PBS). Brains were post-fixed in PFA 2% and cryoprotected  
142 in 20% sucrose overnight at 4°C. The following day, brains were embedded in OCT  
143 (16-004004, Tissue-Tek), frozen in dry-ice-chilled isopentane and stored at -80 °C.  
144 Fourteen-micron cryosections were obtained using a cryostat (Leica). Cryosections  
145 were air-dried at room temperature (RT) and then incubated with blocking solution,  
146 containing 10% normal goat serum (NGS) in 0.3 % Triton X-100 (Sigma) in PBS (PBS-  
147 Triton 0.3%), for 1 hour at RT. Subsequently, sections were incubated with the primary  
148 antibodies either at 4°C overnight or at RT for 2 hours. After three washes with PBS,  
149 sections were incubated with fluorophore-labeled secondary antibodies for 1 hour at  
150 RT. Both primary and secondary antibodies were diluted in blocking solution (10%  
151 NGS in 0.3 % PBS-Triton). After three washes with PBS, sections were incubated in  
152 DAPI solution (300nM, Invitrogen D3571) for nuclear counterstaining, for 10 minutes  
153 at RT, and mounted using Fluoromount™ Aqueous Mounting Medium (Sigma-Aldrich).  
154 Slides were kept at 4°C until image acquisition. Immunofluorescent staining of fixed  
155 cells was performed as described above, except that a solution of 0.05 % Tween 20  
156 (P2287 Merck) in PBS was used instead of 0.3 % Triton - PBS. The references of  
157 primary and secondary antibodies are given in Supplementary Information.

158

### 159 Image acquisition and quantification

160 Images were captured using either a Leica Sp8x Confocal Microscope or a Zeiss wide-  
161 field fluorescent microscope (equipped with an Apotome system). Image processing  
162 and analysis was performed on ZEN 2.0 blue edition software (Zeiss) or Fiji (Schindelin  
163 et al., 2012). Images were generated as maximum intensity projections (MIPs) of the  
164 entire imaging depth. Cell counting was done with Fiji's Cell Counter plugin on MIPs.

165

### 166 Magnetic Activated Cell Sorting (MACSorting) of oligodendroglial cells

167 Mice (P12-P16) were euthanized with CO<sub>2</sub> followed by immediate decapitation. Brains  
168 were rinsed in cold PBS and the dorsal region containing the cortex and corpus  
169 callosum was harvested. Dissociation was performed using the gentleMACS Octo  
170 Dissociator with Heaters (program 37C \_NTDK \_1, Miltenyi Biotec) with the  
171 appropriate tubes (gentleMACS C Tubes, 130-093-237, Miltenyi Biotec) and an  
172 enzymatic mix composed of 0.46 mg/mL papain (WOLS03126, Worthington), 0.1  
173 mg/mL DNase (WOLS02139, Worthington) and 0.124 mg/mL L-cysteine (C7880,  
174 Sigma) and HBSS 1X supplied with Ca<sup>2+</sup> and Mg<sup>2+</sup>. Upon dissociation, the suspension  
175 was filtered (130-110-916, Miltenyi Biotec), the cells were further resuspended in 5  
176 volumes of cold HBSS and centrifuged at 300g for 10 minutes at 4°C. Additionally, a  
177 debris removal step was performed using a Debris Removal Solution (130-109-398,  
178 Miltenyi Biotec). Subsequently, cells were incubated with anti-O4 Microbeads (130-  
179 094-543, Miltenyi Biotec) and magnetic separation was done using Multi-24 Column  
180 Blocks and the MultiMACS Cell24 Separator Plus (130-095-692 and 130-098-637,  
181 Miltenyi Biotec). O4<sup>+</sup> cells were collected in BSA 0.5 % in PBS solution and counted.  
182 To characterize the sorted cell population, part of cell suspension was plated poly-  
183 ornithine coated (P4957, Sigma) and cultured for 2 hours before 4% PFA fixation as  
184 described in (Marie et al., 2018).

185

#### 186 Chromatin immunoprecipitation followed by sequencing (ChIP-Seq)

187 We used NPCs (cultures established from wild type Swiss neonatal mice) or acutely  
188 isolated O4<sup>+</sup> MACSorted cells (harvested from P11-P12 wild type Swiss mice). We  
189 used 4.10<sup>6</sup> cells for immunoprecipitation with TCF12 antibody and 10<sup>6</sup> cells for  
190 immunoprecipitation with each histone (H3K27Ac, H3K4me3, H3K27me3) antibody.  
191 Cells were fixed in PFA 1% for 10 minutes at RT. Fixation was quenched with 125 mM  
192 glycine (G8898, Sigma) for 5 minutes and cells were washed in cold PBS supplied with  
193 protease inhibitor cocktail (11873580001, Roche). Cells were stored as dry cell pellet  
194 at -80°C until further processed. The next steps were performed using iDeal ChIP-Seq  
195 kit for Transcription Factors (C01010055, Diagenode). Briefly, cells were lysed, and  
196 chromatin was sheared using a Bioruptor Pico sonicator (10 sonication cycles 30" ON/  
197 30" OFF, Diagenode). Sheared chromatin was incubated under constant rotation at  
198 4°C O/N with Protein A-coated magnetic beads, coupled with rabbit anti-TCF12  
199 antibody (5 µg, SAB3500566, Sigma). Elution, cross-link reversal and DNA purification  
200 steps were performed according to the manufacturer's protocol (Diagenode). Input  
201 (non-immunoprecipitated sheared chromatin) was used as control. Protocols for  
202 H3K27Ac, H3K4me3, H3K27me3, are described elsewhere (C Marie and C Parras,  
203 unpublished data). The ChIP-Seq libraries were prepared using TruSeq ChIP library  
204 preparation kit (ILLUMINA) and sequenced with a Nextseq 500 platform (ILLUMINA,  
205 57 10<sup>6</sup> of 75 bp pair-end reads per sample). Sequenced datasets were processed with  
206 the Galaxy suite (<https://usegalaxy.org/>). Reads were trimmed using Cutadapt and  
207 Trimmomatic. Data was aligned to the mouse mm10 genome, using Bowtie2. PCR-  
208 derived duplicates were removed using PICARD MarkDuplicates and blacklisted  
209 regions were removed with blacklist. Bigwig coverage files were generated with  
210 bamCoverage and peak calling was performed using MACS (Model-based Analysis of

211 ChIP-Seq) with options: --keep-dup 1, --narrow, --nomodel and filtered according to  
212 the following criteria: (i) length $\geq$ 100bp and (ii) p-value $\leq$ 5%. The Input for each  
213 individual experiment was used as control. Representation of the data was done using  
214 IGV browser (<https://software.broadinstitute.org/software/igv/> , (Robinson et al.,  
215 2011)). Overlapping, region annotation and correlations were done using Genomatix  
216 ([www.genomatix.de](http://www.genomatix.de)). Gene set enrichment analyses were done using Enrichr  
217 (<https://maayanlab.cloud/Enrichr/>),(Chen et al., 2013)). “Promoters” correspond to  
218 regions 1000bp upstream of transcription start site (TSS) and 10bp downstream of  
219 TSS (Genomatix). “Enhancers” correspond to the regions associated with the  
220 presence of histone marks outside promoters.

#### 221 RNA extraction, RT-qPCR and sequencing

222 mRNAs of O4<sup>+</sup> MACSorted cells were extracted using the Macherey-Nagel NucleoSpin  
223 RNA XS kit (740902.50, Macherey-Nagel) and quantified with Nanodrop  
224 spectrophotometer. RNAs were reverse transcribed to cDNA using the Maxima 1str  
225 cDNA Synth Kit (K1642, LifeTechnologies). Quantitative PCR was performed using  
226 LightCycler 480 SYBR Green I Master Mix (4707516001, Roche) on a LightCycler®  
227 96 thermocycler. Samples were run in replicates (duplicates or triplicates). Primers  
228 details are listed in the Supplementary Information. *Gapdh* and *Tbp* genes were used  
229 for normalization. Analyses were performed using the delta-delta Cq method.

230 For RNA sequencing, RNA-Seq libraries were prepared using the NEBNext Ultra II  
231 Directional RNA Library Prep Kit (NEB) and sequenced with the Novaseq 6000  
232 platform (ILLUMINA, 32\*10<sup>6</sup> 100bp pair-end reads per sample). Quality of raw data  
233 was evaluated with FastQC. Poor quality sequences were trimmed or removed with  
234 fastp tool, with default parameters, to retain only good quality paired reads. Illumina  
235 DRAGEN bio-IT Plateform (v3.6.3) was used for mapping on mm10 reference genome  
236 and quantification with gencode vM25 annotation gtf file. Library orientation, library  
237 composition and coverage along transcripts were checked with Picard tools.  
238 Subsequent analyses were conducted with R software. Data were normalized with  
239 edgeR (v3.28.0) bioconductor packages, prior to differential analysis with glm  
240 framework likelihood ratio test from edgeR package workflow. Multiple hypothesis  
241 adjusted p-values were calculated with the Benjamini-Hochberg procedure to control  
242 False Discovery Rate (FDR). Finally, enrichment analysis was conducted with  
243 clusterProfiler R package (v3.14.3) using Gene Set Enrichment Analysis (GSEA), on  
244 hand curated collections and on collections of the MSigDB. For the differential  
245 expression analyses, low expressed genes were filtered, sex was used as covariable  
246 and the cut-offs applied were: FDR < 0.05 and log2FC > 0.5.

#### 247 Statistical analysis

248 Data were plotted and analyzed using MS Excel, GraphPad Prism 8 or R Studio,  
249 unless otherwise specified. In bar graphs, data are presented as mean + standard  
250 error of the mean (SEM). Points indicate independent biological samples (n) of the  
251 same genotype. Statistical tests used are specified in the figure legends.

252

## 253 Results

254

### 255 *TCF12* is altered in gliomas

256 To extend previous studies and obtain a broad view of the type and distribution of  
257 *TCF12* alterations in gliomas, we queried the “Lower Grade Glioma” (LGG, grades II-  
258 III) and “Glioblastoma Multiforme” (GBM, grade IV) data sets of the TCGA PanCancer  
259 Atlas (containing data for 514 and 592 tumors respectively). By interrogating those  
260 datasets for mutations and copy number alterations, we found that *TCF12* alterations  
261 are present in all glioma types (Supplementary Figure 1A). *TCF12* is altered in  
262 approximately 27% and 18% of the GBM and LGG respectively (Figure 1A). In both  
263 tumor types, 70-80% of *TCF12* alterations correspond to heterozygous losses (Figure  
264 1B). We next compared the occurrence of *TCF12* alterations with other common  
265 glioma alterations. We found that *TCF12* alterations co-occur with the most common  
266 glioma alterations (*TP53*, *PTEN*, *NF1*, *EGFR*, *CDKN2A*) but do not co-occur  
267 significantly with *IDH1* or *CIC* alterations (Supplementary Figure 1A and 1B;  
268 Supplementary Table 1), further indicating that *TCF12* alterations are not specific to a  
269 glioma type. We next analyzed whether *TCF12* alterations were associated with  
270 patient clinical outcome. We did not detect an association between *TCF12* alterations  
271 and patient overall survival (Figure 1C and 1D). However, when considering *TCF12*  
272 high and low expression levels (Supplementary Table 2), we noted that patients with  
273 higher *TCF12* expression had a better survival compared to *TCF12*-low patients, both  
274 in GBM and LGG (Figure 1E and 1F), in line with a recently published study (Noorani  
275 et al., 2020). Together, these data suggest a broad and tumor suppressive function for  
276 *TCF12* in gliomas.

277

### 278 *TCF12* is expressed in oligodendroglial cells

279 Given that cells with features of OPCs constitute a major tumor driving population in  
280 gliomas (C. Liu et al., 2011; Weng et al., 2019), we thus explored *TCF12* function in  
281 these cells. In order to characterize *Tcf12* expression across the oligodendrocyte  
282 lineage, we first interrogated a bulk RNA-Seq transcriptome database of mouse and  
283 human cerebral cortex cell types (Zhang et al 2014), finding that *Tcf12* is expressed in  
284 neurons, astrocytes and in oligodendroglial cells in the mouse and human brain, with  
285 higher expression levels in oligodendroglia (Figure 2A). We next processed and  
286 integrated single cell transcriptomic datasets of embryonic and postnatal mouse  
287 oligodendroglial lineage cells (Marques et al., 2016; 2018) to further explore *Tcf12*  
288 expression across the oligodendrocyte (OL) lineage (Supplementary Figure 2A and  
289 2B). Analysis of this data revealed *Tcf12* expression in NSCs, NPCs, and OL lineage  
290 cells, with *Tcf12* expression being higher in early progenitor cells and differentiating  
291 OLs, compared to mature OLs (Figure 2B,C). Given the functional compensation  
292 among E-proteins suggested in neuroglial and other lineages (Ravanpay & Olson,  
293 2008; Wedel et al., 2020; Zhuang et al., 1998), we also analyzed the expression of  
294 *Tcf3* and *Tcf4* in OL lineage cells. While *Tcf3* was expressed in few cells and at quite  
295 low levels, *Tcf4* was expressed in a higher percentage of NSCs, NPCs, and  
296 oligodendroglia than *Tcf12*, with a peak of expression in NPCs and OPCs

297 (Supplementary 2C). Finally, we validated the presence of TCF12 protein in  
298 oligodendroglial cells in wild type mice by performing immunofluorescence of TCF12  
299 along with PDGFRa (identifying OPCs), and the combination of CC1 and OLIG1  
300 (identifying OLs, Figure 2D). We show that TCF12 protein is present in OPCs and  
301 differentiating OLs in the mouse corpus callosum, at postnatal and adult stages (Figure  
302 2E-F).

303

#### 304 **TCF12 primarily occupies active promoter regions in oligodendroglial cells**

305 To explore the potential roles mediated by TCF12 in the oligodendrocyte lineage, we  
306 next sought to identify putative TCF12 gene targets and pathways in oligodendroglial  
307 cells, by generating the chromatin binding profiles of TCF12 in NSC/NPCs and  
308 oligodendroglia. To do so, we first performed magnetic-activated cell sorting (MACS)  
309 using O4 antibodies (recognizing OPCs/OLs, (Dincman et al., 2012) to purify  
310 oligodendroglial cells from wild type postnatal day 12 (P12) mice, obtaining a  
311 population composed of ~30% OPCs and ~60% OLs (thereafter termed “OPCs/OLs”,  
312 Supplementary Figure 3A-B). To assess cell type-specific and overlapping targets for  
313 TCF12, we also prepared neurosphere cultures of neural progenitor cells (thereafter  
314 termed “NPCs”, Supplementary Figure 3A). We then performed chromatin  
315 immunoprecipitation followed by DNA sequencing (ChIP-Seq) using  
316 antibodies directed against TCF12 and histone marks defining status of regulatory  
317 elements as active, poised and repressed. Elements harboring H3K27Ac/H3K4me3  
318 were considered as active, H3K4me3 alone as poised, and H3K27me3 as repressed  
319 (Rada-Iglesias et al., 2011). Peak calling identified 18405 TCF12 binding sites in NPCs  
320 and 28654 in OPCs/OLs that were associated with 6947 and 15670 genes,  
321 respectively (Figure 3A, Supplementary Table 3). Only 3032 genes were shared  
322 between OPCs/OLs and NPCs, suggesting that TCF12 binding is cell type specific  
323 (Figure 3A). Analysis of the distribution of TCF12 binding sites over genomic regions  
324 (promoters, exons, introns, and intragenic regions) indicated that TCF12 binding in  
325 OPCs/OLs was particularly enriched in promoters, representing 42% of bound regions,  
326 compared to only 7% in NPCs (Figure 3B). Visualizing the genomic distribution of  
327 TCF12 binding sites further revealed a strong enrichment of TCF12 binding in the  
328 proximity of promoters in OPCs/OLs but not in NPCs, whereas TCF12 bound the  
329 vicinity of enhancers, defined as regions harboring a histone mark located away from  
330 a transcription start site, in both NPCs and OPCs/OLs (Figure 3C). We then  
331 characterized whether the regulatory regions bound by TCF12 were active, poised or  
332 repressed and found that promoter regions bound by TCF12 were mainly active both  
333 in OPCs/OLs and NPCs (52% active, 12% poised, and 6% repressed in OPCs/OLs,  
334 and 63% active, 23% poised, and 5% repressed in NPCs), while enhancer regions  
335 bound by TCF12 binding corresponded mostly to poised enhancers (52% in  
336 OPCs/OLs and 69% in NPCs) (Figure 3D and Supplementary Figure 3C,  
337 Supplementary Table 3). Altogether, our findings of TCF12 occupancy in gene  
338 regulatory regions enriched in active or poised chromatin marks in both OPCs/OLs and  
339 NPCs, suggest that it directly activates gene expression in both cell types. Notably, the  
340 promoters of genes known as markers of OPCs (*Pdgfra*) and OLs (*Itpr2*, *Mbp*), as well



341 as proliferation markers (*Mki67*, *Cdkn1a*), were bound by TCF12 in OPCs/OLs and  
342 displayed active histone marks (Figure 3E). Finally, we performed enrichment analysis  
343 of the genes associated with TCF12 binding at active promoters in OPCs/OLs. This  
344 analysis revealed enrichment of pathways related to proliferation,  
345 translation/ribosomes, proteasome, and signaling pathways involved in  
346 oligodendrocyte development and cancer (such as MYC, TGF $\beta$ , PI3K/AKT/mTOR,  
347 WNT-beta catenin, p53, Notch) (Figure 3F; Supplementary Figure 3D; Supplementary  
348 Table 4). Therefore, all together, these data suggest that TCF12 regulates  
349 oligodendrocyte development, by positively regulating gene expression.

350

### 351 TCF12 inactivation in OPCs *in vivo* leads to proliferation defects

352 To further characterize the roles of TCF12 in oligodendrocyte lineage, we generated  
353 an inducible *Tcf12* knockout mouse model. To do so, we combined a *Tcf12*<sup>fllox</sup> mice  
354 having loxP sites flanking the exons encoding the bHLH domain (Mesman & Smidt,  
355 2017; Wojciechowski et al., 2007), with mice carrying *Pdgfra::CreER*<sup>T</sup> driver (Kang et  
356 al., 2010) and *YFP* inducible reporter (Srinivas et al., 2001). Thus, in this  
357 *Pdgfra::CreER*<sup>T</sup>;*Rosa26*<sup>LSL-YFP</sup>;*Tcf12*<sup>fllox</sup> model, TCF12 inactivation can be induced  
358 specifically in OPCs upon tamoxifen-dependent Cre-mediated recombination and the  
359 cell fates of *Tcf12*-mutant cells can be traced by the YFP reporter. In this model, we  
360 compared mutant heterozygous (*Tcf12*<sup>het</sup>) and homozygous (*Tcf12*<sup>hom</sup>) animals with  
361 intact *Tcf12* (*Tcf12*<sup>ctrl</sup>) littermates (Supplementary Figure 4A-B). As a first step, we  
362 administrated tamoxifen at P13, at the peak of oligodendrocyte differentiation in the  
363 corpus callosum, and performed our analysis at P16 to focus on the immediate effects  
364 following *Tcf12* inactivation (Figure 4A). We first validated the efficacy of Cre-mediated  
365 recombination of the *Tcf12*<sup>fllox</sup> allele by quantifying mutated *Tcf12* transcripts by RT-  
366 qPCR on OPCs/OLs purified by O4<sup>+</sup> magnetic sorting from P16 cortices. We observed  
367 a 25% to 50% decrease in *Tcf12* transcript levels in *Tcf12*<sup>het</sup> and *Tcf12*<sup>hom</sup> animals  
368 respectively, compared to *Tcf12*<sup>ctrl</sup> (Supplementary Figure 4D), which is consistent with  
369 ~60% of O4<sup>+</sup> cells being recombined (YFP<sup>+</sup>) at the time of analysis (Supplementary  
370 Figure 4E). We next asked whether *Tcf12* inactivation affected OPC proliferation and  
371 differentiation properties by performing combined immunostaining with antibodies  
372 against GFP to detect the recombined (YFP<sup>+</sup>) cells, PDGFR $\alpha$ /Ki67 to label OPCs and  
373 their proliferative status, and CC1/OLIG1 to label different OL stages (Figure 4B, C).  
374 Remarkably, while the density of recombined OPCs (PDGFR $\alpha$ <sup>+</sup>GFP<sup>+</sup>/mm<sup>2</sup>) (Figure 4D)  
375 and the fraction of recombined OPCs (PDGFR $\alpha$ <sup>+</sup>GFP<sup>+</sup>/PDGFR $\alpha$ <sup>+</sup> and PDGFR $\alpha$ <sup>+</sup>GFP<sup>+</sup>/  
376 GFP<sup>+</sup>) (Figure 4E,F) remained unchanged in the corpus callosum across the different  
377 genotypes, the fraction of proliferating OPCs was reduced by two-fold in *Tcf12*<sup>hom</sup>  
378 animals (28.2%  $\pm$  3.94% in *Tcf12*<sup>ctrl</sup>, 25.3%  $\pm$  3.31% in *Tcf12*<sup>het</sup>, and 13.6%  $\pm$  2.42% in  
379 *Tcf12*<sup>hom</sup>, Figure 4G). This result parallels our ChIP-Seq analysis, which indicated a  
380 positive regulation of proliferation by TCF12. We then analyzed different stages of  
381 differentiating OLs identified by their differential expression of CC1 and OLIG1 (Marie  
382 et al., 2018; Nakatani et al., 2013). We did not detect any difference among genotypes  
383 in the proportions of recombined cells being early (CC1<sup>+</sup>OLIG1<sup>+</sup>GFP<sup>+</sup> cells) and  
384 intermediate/late differentiating OLs (CC1<sup>+</sup>OLIG1<sup>+</sup>GFP<sup>+</sup> cells), although we noted a

385 trend towards more mature oligodendrocytes in *Tcf12<sup>hom</sup>* mice (Figure 4H-I). Together,  
386 our data suggest that TCF12 is a positive regulator of OPC proliferation and likely  
387 dispensable in OL differentiation.

388 To address whether changes in OPC proliferation and differentiation persist following  
389 *Tcf12* inactivation, we induced *Pdgfra::CreERT;Rosa<sup>LSL-YFP</sup>;Tcf12<sup>fllox</sup>* mice as  
390 previously at P13 and harvested them ten days later (P23; Supplementary Figure 4F-  
391 N). We noticed that the densities of recombined cells (PDGFRa+GFP+/mm<sup>2</sup>) were  
392 similar among genotypes (Supplementary Figure 4I). In addition, OPC proliferation did  
393 not change between genotypes, nor differentiating oligodendrocytes (Supplementary  
394 Figure 4J-N). These results suggest that TCF12 is, in the long term, dispensable for  
395 proper OPC proliferation and differentiation.

396

397 [Transcriptomic analyses of \*Tcf12\*-deficient oligodendroglial cells highlight](#)  
398 [differentiation defects and deregulation of cancer related pathways](#)

399 To gain insights into the molecular mechanisms altered upon *Tcf12* inactivation, we  
400 performed a transcriptomic analysis. We purified OPCs/OLs (O4<sup>+</sup> cells) at P16 from  
401 control and mutant mice three days after tamoxifen induction and performed RNA  
402 sequencing (Figure 5A). Using stringent criteria of statistical analysis (FDR <0.05,  
403 log<sub>2</sub>FC >0.5), we detected few differentially expressed genes (Supplementary Table  
404 5). We thus analyzed the data by the method of gene set enrichment analysis  
405 (GSEA). To this goal, we first performed GSEA using a hand-curated collection of  
406 oligodendroglial gene sets derived from publications (Marques et al., 2016, 2018;  
407 Weng et al., 2019; Zhang et al., 2014) (collection provided in Supplementary Table 6).  
408 In line with our observations from immunofluorescence analysis, we observed a  
409 downregulation of gene sets related to OPCs and their proliferation in mutant animals  
410 compared to controls (Figure 5B and Supplementary Table 7). Moreover, we noted a  
411 positive enrichment of gene sets related to more differentiated oligodendrocytes in  
412 mutant compared to control animals (Figure 5B and Supplementary Table 7).  
413 Interestingly, enrichment analysis comparing *Tcf12<sup>Het</sup>* vs *Tcf12<sup>ctrl</sup>* cells revealed similar  
414 defects in proliferation and differentiation, although we were not able to detect these  
415 changes with the immunofluorescence approach (Supplementary Figure 5A).

416 To establish a broader view of the data beyond the oligodendrocyte signatures, we  
417 carried out GSEA using the highly curated HALLMARK collection from the molecular  
418 signature database (MSigDB) (Liberzon et al., 2015). In agreement with the previous  
419 analysis, comparison between *Tcf12<sup>hom</sup>* and controls also revealed a negative  
420 enrichment of cell cycle processes (E2F targets, mitotic spindle, G2M checkpoint),  
421 together with epithelial-mesenchymal transition (EMT) gene sets, and a positive  
422 enrichment of pathways related to metabolism (oxidative phosphorylation, fatty acid,  
423 adipogenesis, and reactive oxygen species) and MYC target genes (Figure 5C).  
424 Parallel analysis of *Tcf12<sup>het</sup>* compared to controls showed no enrichment in cell cycle  
425 processes, but upregulation of processes related to cholesterol homeostasis, and  
426 downregulation of immune signatures (inflammatory and interferon responses), EMT  
427 and NOTCH signaling (Supplementary Figure 5B). Querying additional collections  
428 from the molecular signature database (REACTOME, KEGG,

429 GO\_Biological\_Process), we observed that *Tcf12* inactivation was also associated  
430 with negative regulation of developmental pathways (such as NOTCH, BMP) and  
431 pathways related to cancer (such as cell cycle, extracellular matrix, ribosome, TP53,  
432 (Supplementary Figure 5C). Interestingly, the absence of functional TCF12 induced a  
433 deregulation of ribosome biogenesis and translation-related pathways (Figure 5D,  
434 Supplementary Figure 5C) which are a strictly tuned in a multi-staged process  
435 controlling diverse cellular responses, such as cell proliferation and growth (Hetman &  
436 Slomnicki, 2019).

437

#### 438 Conservation of TCF12 regulated pathways in human gliomas

439 To determine how TCF12-dependent pathways may be relevant in gliomas, we took  
440 advantage of our previously published cohort of *TCF12*-mutated oligodendrogliomas  
441 (Labreche et al., 2015). We re-analyzed the transcriptomics data, comparing samples  
442 with *TCF12* alterations (mutations and/or loss of heterozygosity and/or copy number  
443 loss of heterozygosity without loss of heterozygosity; n=20) to non-altered (non-  
444 mutated and normal *TCF12* genomic status; n=35) samples (Supplementary Table 8).  
445 We performed gene set enrichment analysis using the HALLMARK collection from the  
446 molecular signature database. Interestingly, this analysis showed positive enrichment  
447 of pathways related to MYC, oxidative phosphorylation, cell cycle (E2F targets) in  
448 *TCF12*-altered tumors, similar to our analysis of *Tcf12*-inactivated cells (Figure 5E). In  
449 addition, EMT and immune response signatures were negatively enriched in *TCF12*-  
450 altered tumors. We also interrogated the REACTOME collection and found that  
451 pathways related to translation and regulation of p53 activity were positively enriched  
452 in *TCF12*-altered tumors (Figure 5F). These data indicate that the TCF12-regulated  
453 processes that we identified from our molecular analyses of mouse oligodendroglial  
454 cells are conserved in a glioma setting.

#### 455 Discussion

456 Oligodendrocyte precursor cells (OPCs) have been proposed to be the cells of origin  
457 for gliomas and responsible for tumor expansion (C. Liu et al., 2011; Persson et al.,  
458 2010; Sugiarto et al., 2011; Weng et al., 2019), although mutations may arise as early  
459 as the neural stem cell stage (J. H. Lee et al., 2018; C. Liu et al., 2011). Understanding  
460 how genes altered in gliomas impact the lineage of origin can provide insights into their  
461 implication in gliomas, as these functions may be conserved in a tumor context. In this  
462 study, we aimed to explore the roles of TCF12 in the oligodendroglial lineage and in  
463 gliomagenesis. Although TCF12, similar to other members of the E protein family  
464 (TCF3, TCF4), is a ubiquitously expressed protein, its function remains poorly  
465 characterized in cell-specific contexts. *Tcf12* was reported to be expressed in spinal  
466 cord oligodendroglial cells and oligodendroglial cultures (Fu et al., 2009; Sussman et  
467 al., 2002; Wedel et al., 2020). Here, querying resources of bulk and single cell  
468 transcriptomic data sets from embryonic and postnatal mouse brain (Marques et al.,  
469 2016, 2018; Zhang et al., 2014), we find that *Tcf12* is expressed throughout  
470 oligodendrocyte lineage development, with higher transcript levels in progenitor and

471 cells at early stages of differentiation. By immunofluorescence, we demonstrate a  
472 similar pattern of TCF12 protein in postnatal and adult oligodendroglia, with TCF12  
473 levels peaking in OPC and differentiating oligodendrocytes.

474 We report the first analysis of TCF12 genome wide binding sites in  
475 oligodendroglial cells acutely isolated from the postnatal cerebral cortex. TCF12  
476 binding sites were enriched in promoter regions compared to other genomic regions,  
477 and associated with active histone marks, suggesting that TCF12 acts as a  
478 transcriptional activator in oligodendrocyte lineage cells. The key regulators of  
479 oligodendrocyte development ASCL1 and OLIG2 are known to dimerize with E-  
480 proteins to control gene expression. TCF12 binding sites partially overlap with those  
481 of ASCL1 and OLIG2 (C Marie and C Parras, unpublished data) suggesting interaction  
482 between TCF12 and these proteins in transcriptional regulation of oligodendroglial  
483 cells. Interestingly, a recent study pointed to a preferential interaction of TCF12 with  
484 OLIG1 in HEK cells (Wedel et al., 2020). Future studies will be needed to determine  
485 the contribution of the different TCF12 heterodimers in the regulation of OPC  
486 proliferation and differentiation.

487 We further show that specific inactivation of *Tcf12* in postnatal OPCs result in  
488 a significant decrease in the proportion of proliferating OPCs without impacting the  
489 proportions of OPCs and oligodendrocytes. This result indicates that TCF12 controls  
490 OPC proliferation, as suggested by our ChIP-Seq data and in agreement with our  
491 observations of high *Tcf12* expression in neural stem and progenitors of the mouse  
492 brain. Transcriptomic analyses of *Tcf12* deficient cells offered a higher resolution of  
493 altered processes and further pointed out differentiation defects, that we were unable  
494 to detect from our immunohistochemical analysis, although we noted a trend towards  
495 more mature oligodendrocytes in *Tcf12*-deficient mice. Enrichment of oligodendrocyte  
496 signatures in *Tcf12*-deficient cells may reflect the consequences of decreased OPC  
497 proliferation. Our data thus suggest that in the oligodendroglial lineage, TCF12 may  
498 primarily act on proliferation, rather than differentiation. This is in agreement with a  
499 recent study showing that ectopic TCF12 does not affect oligodendrocyte  
500 differentiation of brain organotypic slices (Wedel et al., 2020). However, our finding of  
501 TCF12 binding to the promoters of oligodendrocyte genes implies a possible and  
502 subtle implication of TCF12 in the control of differentiation. We noted that the effects  
503 of *Tcf12* inactivation on proliferation are transient. Given that all three E-protein genes  
504 (*Tcf12*, *Tcf3*, *Tcf4*) are expressed in developing oligodendrocytes, it is possible that  
505 TCF3 and TCF4 may compensate for TCF12 deficiency, as shown for *Tcf12*<sup>-/-</sup> mouse  
506 cerebella that display upregulation of *Tcf4* transcripts (Ravanpay & Olson, 2008).  
507 Although we did not detect an upregulation in *Tcf3* and *Tcf4* transcripts in *Tcf12*-  
508 deficient OPCs three days post inactivation (Supplementary Table 5), we cannot  
509 exclude that a compensation takes place later on, given the strong levels of *Tcf4*  
510 transcripts present in OPCs.

511 Transcriptomic analysis of both *Tcf12*-deficient oligodendroglia (this study) and  
512 TCF12-mutated gliomas (Labreche et al., 2015) revealed few significantly differentially  
513 expressed genes in the context of TCF12 inactivation compared to wild type TCF12.  
514 This result is intriguing given that we find TCF12 binds over 15,000 genes in the

515 genome of oligodendroglial cells and therefore one might expect substantial  
516 deregulation of gene expression in the absence of functional TCF12. However, the  
517 apparent lack of gene expression differences may in fact highlight the diversity of  
518 processes directly controlled by TCF12, as many of them may interact and regulate  
519 each other, leading to an overall normalization of gene expression.

520 Interestingly, our ChIP-Seq and RNA-Seq data suggest a control by TCF12 of  
521 several processes involved in cancer, many of which are also perturbed in TCF12  
522 altered oligodendrogliomas. For example, we observed a negative enrichment of terms  
523 related to the extracellular matrix and epithelial-mesenchymal transition (EMT) in  
524 *Tcf12*-deficient OPCs and in *TCF12*-altered oligodendrogliomas. Accordingly, TCF12  
525 was shown to repress E-cadherin expression, and its expression has been correlated  
526 with increased invasion, migration, and metastasis in several cancers (He et al., 2016;  
527 C.-C. Lee et al., 2011; Luo et al., 2020), including GBM (Zhu et al., 2021). An important  
528 difference we noted between our mouse model and *TCF12*-altered  
529 oligodendrogliomas is that while proliferation is decreased in *Tcf12*-deficient OPCs,  
530 loss of *TCF12* is associated with increased proliferation in human oligodendrogliomas.  
531 We previously showed that *TCF12* mutations in oligodendrogliomas were associated  
532 with more aggressive tumor features (Labreche et al., 2015), indicative of a tumor-  
533 suppressive function for TCF12. In line with these findings, TCF12 was recently  
534 identified as a master regulator of the differentiated, rather than stem-like, state in  
535 glioblastomas (Castellan et al., 2021). In contrast, a previous study showed that *TCF12*  
536 silencing decreased proliferation and invasion in glioma cell lines (Godoy et al., 2016).  
537 All these data suggest that mechanisms induced by the mutational and cellular  
538 contexts in gliomas may interfere with TCF12-mediated regulation of proliferation.

539 Importantly, our study implies novel roles for TCF12 in the control of ribosome  
540 biogenesis and translation. TCF12 has been shown to bind the bHLH transcription  
541 factor MYC in rat fibroblasts (Agrawal et al., 2010). MYC directly controls ribosome  
542 biogenesis and translation, by inducing the transcription of ribosomal RNA, ribosomal  
543 proteins and genes involved in the maturation of ribosomal RNAs (Piazzi et al., 2019).  
544 Perturbation of the ribosome biogenesis process has been shown to activate p53  
545 (Piazzi et al., 2019). Interestingly, processes related to MYC, TP53 and  
546 ribosome/translation were enriched in both *Tcf12*-deficient oligodendroglial cells and  
547 *TCF12*-altered oligodendrogliomas. In addition, we detected binding of TCF12 on  
548 promoters of *Myc*, *Mycn* and genes involved in ribosome biogenesis (such as *Rpl5*,  
549 *Ruvbl2*, *Fbl*) in oligodendroglial cells. Our study is the first to suggest a link between  
550 TCF12 and ribosome biogenesis. Of note, interactions between E-proteins and  
551 ribosome biogenesis were previously reported: TCF4 is detected in the nucleolus,  
552 where ribosome biogenesis occurs, and loss of function mutants inhibit protein  
553 synthesis in rat hippocampal neurons (Slomnicki et al., 2016). Moreover, TCF4  
554 overexpression represses MYC target genes in a leukemic cell line (N. Liu et al., 2019).  
555 In conclusion, our study suggests that TCF12 directly regulates many signaling  
556 pathways in oligodendroglia development that are relevant in a glioma context.

557

## 558 Author contributions

559 SA and EH conceptualized the study. SA, CM, CP and EH designed experiments and  
560 analyzed data. SA and CM performed experiments. BG, JG and CP analyzed  
561 transcriptomic data generated in this paper and from public databases. MS, CP and  
562 EH obtained funding. EH supervised the study. SA, CP and EH wrote the manuscript.  
563 All authors revised the manuscript.  
564

## 565 References

- 566 Agrawal, P., Yu, K., Salomon, A. R., & Sedivy, J. M. (2010). Proteomic profiling of Myc-  
567 associated proteins. *Cell Cycle*, 9(24). <https://doi.org/10.4161/cc.9.24.14199>
- 568 Aihara, K., Mukasa, A., Nagae, G., Nomura, M., Yamamoto, S., Ueda, H., Tatsuno, K.,  
569 Shibahara, J., Takahashi, M., Momose, T., Tanaka, S., Takayanagi, S., Yanagisawa, S.,  
570 Nejo, T., Takahashi, S., Omata, M., Otani, R., Saito, K., Narita, Y., ... Saito, N. (2017).  
571 Genetic and epigenetic stability of oligodendrogliomas at recurrence. *Acta*  
572 *Neuropathologica Communications*, 5(1). <https://doi.org/10.1186/s40478-017-0422-z>
- 573 Alcantara Llaguno, S., Chen, J., Kwon, C.-H., Jackson, E. L., Li, Y., Burns, D. K., Alvarez-  
574 Buylla, A., & Parada, L. F. (2009). Malignant Astrocytomas Originate from Neural  
575 Stem/Progenitor Cells in a Somatic Tumor Suppressor Mouse Model. *Cancer Cell*, 15(1),  
576 45–56. <https://doi.org/10.1016/j.ccr.2008.12.006>
- 577 Bielle, F., Ducray, F., Mokhtari, K., Dehais, C., Adle-Biassette, H., Carpentier, C., Chanut, A.,  
578 Polivka, M., Poggioli, S., Rosenberg, S., Giry, M., Marie, Y., Duyckaerts, C., Sanson, M.,  
579 Figarella-Branger, D., & Idbaih, A. (2017). Tumor cells with neuronal intermediate  
580 progenitor features define a subgroup of 1p/19q co-deleted anaplastic gliomas. *Brain*  
581 *Pathology*, 27(5), 567–579. <https://doi.org/10.1111/bpa.12434>
- 582 Castellan, M., Guarnieri, A., Fujimura, A., Zanconato, F., Battilana, G., Panciera, T.,  
583 Sladitschek, H. L., Contessotto, P., Citron, A., Grilli, A., Romano, O., Biciato, S., Fassan,  
584 M., Porcù, E., Rosato, A., Cordenonsi, M., & Piccolo, S. (2021). Single-cell analyses  
585 reveal YAP/TAZ as regulators of stemness and cell plasticity in glioblastoma. *Nature*  
586 *Cancer*, 2(2), 174–188. <https://doi.org/10.1038/s43018-020-00150-z>
- 587 Chen, E. Y., Tan, C. M., Kou, Y., Duan, Q., Wang, Z., Meirelles, G., Clark, N. R., & Ma'ayan,  
588 A. (2013). Enrichr: interactive and collaborative HTML5 gene list enrichment analysis tool.  
589 *BMC Bioinformatics*, 14(1). <https://doi.org/10.1186/1471-2105-14-128>
- 590 Dawson, M. R. L., Polito, A., Levine, J. M., & Reynolds, R. (2003). NG2-expressing glial  
591 progenitor cells: An abundant and widespread population of cycling cells in the adult rat  
592 CNS. *Molecular and Cellular Neuroscience*, 24(2), 476–488.  
593 [https://doi.org/10.1016/S1044-7431\(03\)00210-0](https://doi.org/10.1016/S1044-7431(03)00210-0)
- 594 Dincman, T. A., Beare, J. E., Ohri, S. S., & Whittemore, S. R. (2012). Isolation of cortical mouse  
595 oligodendrocyte precursor cells. *Journal of Neuroscience Methods*, 209(1).  
596 <https://doi.org/10.1016/j.jneumeth.2012.06.017>
- 597 Emmanuel, A. O., Arnovitz, S., Haghi, L., Mathur, P. S., Mondal, S., Quandt, J., Okoreeh, M.  
598 K., Maienschein-Cline, M., Khazaie, K., Dose, M., & Gounari, F. (2018). TCF-1 and HEB  
599 cooperate to establish the epigenetic and transcription profiles of CD4 + CD8 +  
600 thymocytes. *Nature Immunology*, 19(12), 1366–1378. <https://doi.org/10.1038/s41590-018-0254-4>
- 601
- 602 Fu, H., Cai, J., Clevers, H., Fast, E., Gray, S., Greenberg, R., Jain, M. K., Ma, Q., Qiu, M.,  
603 Rowitch, D. H., Taylor, C. M., & Stiles, C. D. (2009). A Genome-Wide Screen for Spatially  
604 Restricted Expression Patterns Identifies Transcription Factors That Regulate Glial  
605 Development. *Journal of Neuroscience*. <https://doi.org/10.1523/JNEUROSCI.0160-09.2009>
- 606
- 607 Godoy, P. R. D. v, Montaldi, A. P. L., & Sakamoto-Hojo, E. T. (2016). HEB silencing induces  
608 anti-proliferative effects on U87MG cells cultured as neurospheres and monolayers.  
609 *Molecular Medicine Reports*, 14(6), 5253–5260. <https://doi.org/10.3892/mmr.2016.5877>

- 610 He, J., Shen, S., Lu, W., Zhou, Y., Hou, Y., Zhang, Y., Jiang, Y., Liu, H., & Shao, Y. (2016).  
611 HDAC1 promoted migration and invasion binding with TCF12 by promoting EMT progress  
612 in gallbladder cancer. *Oncotarget*, 7(22). <https://doi.org/10.18632/oncotarget.8740>
- 613 Hetman, M., & Slomnicki, L. P. (2019). Ribosomal biogenesis as an emerging target of  
614 neurodevelopmental pathologies. In *Journal of Neurochemistry* (Vol. 148, Issue 3, pp.  
615 325–347). Blackwell Publishing Ltd. <https://doi.org/10.1111/jnc.14576>
- 616 Jones-Mason, M. E., Zhao, X., Kappes, D., Lasorella, A., Iavarone, A., & Zhuang, Y. (2012). E  
617 Protein Transcription Factors Are Required for the Development of CD4 + Lineage T  
618 Cells. *Immunity*, 36(3), 348–361. <https://doi.org/10.1016/j.immuni.2012.02.010>
- 619 Kang, S. H., Fukaya, M., Yang, J. K., Rothstein, J. D., & Bergles, D. E. (2010). NG2+ CNS glial  
620 progenitors remain committed to the oligodendrocyte lineage in postnatal life and  
621 following neurodegeneration. *Neuron*, 68(4), 668–681.  
622 <https://doi.org/10.1016/j.neuron.2010.09.009>
- 623 Kessar, N., Fogarty, M., Iannarelli, P., Grist, M., Wegner, M., & Richardson, W. D. (2006).  
624 Competing waves of oligodendrocytes in the forebrain and postnatal elimination of an  
625 embryonic lineage. *Nature Neuroscience*, 9(2), 173–179. <https://doi.org/10.1038/nn1620>
- 626 Labreche, K., Simeonova, I., Kamoun, A., Gleize, V., Chubb, D., Letouzé, E., Riazalhosseini,  
627 Y., Dobbins, S. E., Elarouci, N., Ducray, F., de Reyniès, A., Zelenika, D., Wardell, C. P.,  
628 Frampton, M., Saulnier, O., Pastinen, T., Hallout, S., Figarella-Branger, D., Dehais, C., ...  
629 Wager, M. (2015). TCF12 is mutated in anaplastic oligodendroglioma. *Nature*  
630 *Communications*. <https://doi.org/10.1038/ncomms8207>
- 631 Lee, C.-C., Chen, W.-S., Chen, C.-C., Chen, L.-L., Lin, Y.-S., Fan, C.-S., & Huang, T.-S. (2011).  
632 *TCF12 Protein Functions as Transcriptional Repressor of E-cadherin, and Its*  
633 *Overexpression Is Correlated with Metastasis of Colorectal Cancer* \* □ S.  
634 <https://doi.org/10.1074/jbc.M111.258947>
- 635 Lee, J. H., Lee, J. E., Kahng, J. Y., Kim, S. H., Park, J. S., Yoon, S. J., Um, J. Y., Kim, W. K.,  
636 Lee, J. K., Park, J., Kim, E. H., Lee, J. H., Lee, J. H., Chung, W. S., Ju, Y. S., Park, S. H.,  
637 Chang, J. H., Kang, S. G., & Lee, J. H. (2018). Human glioblastoma arises from  
638 subventricular zone cells with low-level driver mutations. *Nature*, 560(7717), 243–247.  
639 <https://doi.org/10.1038/s41586-018-0389-3>
- 640 Li, Y., Brauer, P. M., Singh, J., Xhiku, S., Yoganathan, K., Zúñiga-Pflücker, J. C., & Anderson,  
641 M. K. (2017). Targeted Disruption of TCF12 Reveals HEB as Essential in Human  
642 Mesodermal Specification and Hematopoiesis. *Stem Cell Reports*, 9(3), 779–795.  
643 <https://doi.org/10.1016/j.stemcr.2017.07.011>
- 644 Liberzon, A., Birger, C., Thorvaldsdóttir, H., Ghandi, M., Mesirov, J. P., & Tamayo, P. (2015).  
645 The Molecular Signatures Database Hallmark Gene Set Collection. *Cell Systems*, 1(6).  
646 <https://doi.org/10.1016/j.cels.2015.12.004>
- 647 Liu, C., Sage, J. C., Miller, M. R., Verhaak, R. G. W., Hippenmeyer, S., Vogel, H., Foreman, O.,  
648 Bronson, R. T., Nishiyama, A., Luo, L., & Zong, H. (2011). Mosaic Analysis with Double  
649 Markers Reveals Tumor Cell of Origin in Glioma. *Cell*, 146(2), 209–221.  
650 <https://doi.org/10.1016/J.CELL.2011.06.014>
- 651 Liu, N., Song, J., Xie, Y., Wang, X.-L., Rong, B., Man, N., Zhang, M.-M., Zhang, Q., Gao, F.-F.,  
652 Du, M.-R., Zhang, Y., Shen, J., Xu, C.-H., Hu, C.-L., Wu, J.-C., Liu, P., Zhang, Y.-L., Xie,  
653 Y.-Y., Liu, P., ... Sun, X.-J. (2019). Different roles of E proteins in t(8;21) leukemia: E2-2  
654 compromises the function of AETFC and negatively regulates leukemogenesis.  
655 *Proceedings of the National Academy of Sciences*, 116(3).  
656 <https://doi.org/10.1073/pnas.1809327116>
- 657 Louis, D. N., Perry, A., Reifenberger, G., von Deimling, A., Figarella-Branger, D., Cavenee, W.  
658 K., Ohgaki, H., Wiestler, O. D., Kleihues, P., & Ellison, D. W. (2016). The 2016 World  
659 Health Organization Classification of Tumors of the Central Nervous System: a summary.  
660 *Acta Neuropathologica*, 131(6), 803–820. <https://doi.org/10.1007/s00401-016-1545-1>
- 661 Luo, C., Balsa, E., Perry, E. A., Liang, J., Tavares, C. D., Vazquez, F., Widlund, H. R., &  
662 Puigserver, P. (2020). H3K27me3-mediated PGC1α gene silencing promotes melanoma  
663 invasion through WNT5A and YAP. *Journal of Clinical Investigation*, 130(2).  
664 <https://doi.org/10.1172/JCI130038>
- 665 Marie, C., Clavairoly, A., Frah, M., Hmidan, H., Yan, J., Zhao, C., van Steenwinckel, J., Daveau,  
666 R., Zalc, B., Hassan, B., Thomas, J.-L., Gressens, P., Ravassard, P., Moszer, I., Martin,  
667 D. M., Lu, Q. R., & Parras, C. (2018). Oligodendrocyte precursor survival and  
668 differentiation requires chromatin remodeling by Chd7 and Chd8. *Proceedings of the*

- 669 *National Academy of Sciences*, 115(35), E8246–E8255.  
670 <https://doi.org/10.1073/pnas.1802620115>
- 671 Marques, S., van Bruggen, D., Vanichkina, D. P., Floriddia, E. M., Munguba, H., Våremo, L.,  
672 Giacomello, S., Falcão, A. M., Meijer, M., Björklund, Å. K., Hjerling-Leffler, J., Taft, R. J.,  
673 & Castelo-Branco, G. (2018). Transcriptional Convergence of Oligodendrocyte Lineage  
674 Progenitors during Development. *Developmental Cell*, 46(4), 504–517.e7.  
675 <https://doi.org/10.1016/j.devcel.2018.07.005>
- 676 Marques, S., Zeisel, A., Codeluppi, S., van Bruggen, D., Mendanha Falcao, A., Xiao, L., Li, H.,  
677 Haring, M., Hochgerner, H., Romanov, R. A., Gyllborg, D., Munoz-Manchado, A. B., la  
678 Manno, G., Lonnerberg, P., Floriddia, E. M., Rezayee, F., Ernfors, P., Arenas, E., Hjerling-  
679 Leffler, J., ... Castelo-Branco, G. (2016). Oligodendrocyte heterogeneity in the mouse  
680 juvenile and adult central nervous system. *Science*, 352(6291), 1326–1329.  
681 <https://doi.org/10.1126/science.aaf6463>
- 682 Massari, M. E., & Murre, C. (2000). Helix-loop-helix proteins: regulators of transcription in  
683 eucaryotic organisms. *Molecular and Cellular Biology*, 20(2), 429–440.  
684 <http://www.ncbi.nlm.nih.gov/pubmed/10611221>
- 685 Mesman, S., & Smidt, M. P. (2017). Tcf12 Is Involved in Early Cell-Fate Determination and  
686 Subset Specification of Midbrain Dopamine Neurons. *Frontiers in Molecular*  
687 *Neuroscience*, 10, 353. <https://doi.org/10.3389/fnmol.2017.00353>
- 688 Nakatani, H., Martin, E., Hassani, H., Clavairoly, A., Maire, C. L., Viadieu, A., Kerninon, C.,  
689 Delmasure, A., Frah, M., Weber, M., Nakafuku, M., Zalc, B., Thomas, J. L., Guillemot, F.,  
690 Nait-Oumesmar, B., & Parras, C. (2013). Ascl1/Mash1 promotes brain  
691 oligodendrogenesis during myelination and remyelination. *Journal of Neuroscience*,  
692 33(23), 9752–9768. <https://doi.org/10.1523/JNEUROSCI.0805-13.2013>
- 693 Neftel, C., Laffy, J., Filbin, M. G., Hara, T., Shore, M. E., Rahme, G. J., Richman, A. R.,  
694 Silverbush, D., Shaw, M. L., Hebert, C. M., Dewitt, J., Gritsch, S., Perez, E. M., Gonzalez  
695 Castro, L. N., Lan, X., Druck, N., Rodman, C., Dionne, D., Kaplan, A., ... Suvà, M. L.  
696 (2019). An Integrative Model of Cellular States, Plasticity, and Genetics for Glioblastoma.  
697 *Cell*, 178(4), 835–849.e21. <https://doi.org/10.1016/j.cell.2019.06.024>
- 698 Noorani, I., de La Rosa, J., Choi, Y., Strong, A., Ponstingl, H., Vijayabaskar, M. S., Lee, J., Lee,  
699 E., Richard-Londt, A., Friedrich, M., Furlanetto, F., Fuente, R., Banerjee, R., Yang, F.,  
700 Law, F., Watts, C., Rad, R., Vassiliou, G., Kim, J. K., ... Bradley, A. (2020). PiggyBac  
701 mutagenesis and exome sequencing identify genetic driver landscapes and potential  
702 therapeutic targets of EGFR-mutant gliomas. *Genome Biology*, 21(1).  
703 <https://doi.org/10.1186/s13059-020-02092-2>
- 704 Ostrom, Q. T., Gittleman, H., Liao, P., Vecchione-Koval, T., Wolinsky, Y., Kruchko, C., &  
705 Barnholtz-Sloan, J. S. (2017). CBTRUS Statistical Report: Primary brain and other central  
706 nervous system tumors diagnosed in the United States in 2010–2014. *Neuro-Oncology*.  
707 <https://doi.org/10.1093/neuonc/nox158>
- 708 Parras, C., Marie, C., Zhao, C., & Lu, Q. R. (2020). Chromatin remodelers in oligodendroglia.  
709 *GLIA*, 68(8), 1604–1618. <https://doi.org/10.1002/glia.23837>
- 710 Persson, A. I., Petritsch, C., Swartling, F. J., Itsara, M., Sim, F. J., Auvergne, R., Goldenberg,  
711 D. D., Vandenberg, S. R., Nguyen, K. N., Yakovenko, S., Ayers-Ringler, J., Nishiyama,  
712 A., Stallcup, W. B., Berger, M. S., Bergers, G., McKnight, T. R., Goldman, S. A., & Weiss,  
713 W. A. (2010). Non-Stem Cell Origin for Oligodendroglioma. *Cancer Cell*, 18(6), 669–682.  
714 <https://doi.org/10.1016/j.ccr.2010.10.033>
- 715 Piazza, M., Bavelloni, A., Gallo, A., Faenza, I., & Blalock, W. L. (2019). Signal Transduction in  
716 Ribosome Biogenesis: A Recipe to Avoid Disaster. *International Journal of Molecular*  
717 *Sciences*, 20(11). <https://doi.org/10.3390/ijms20112718>
- 718 Rada-Iglesias, A., Bajpai, R., Swigut, T., Brugmann, S. A., Flynn, R. A., & Wysocka, J. (2011).  
719 A unique chromatin signature uncovers early developmental enhancers in humans.  
720 *Nature*, 470(7333). <https://doi.org/10.1038/nature09692>
- 721 Ravanpay, A. C., & Olson, J. M. (2008). E protein dosage influences brain development more  
722 than family member identity. *Journal of Neuroscience Research*.  
723 <https://doi.org/10.1002/jnr.21615>
- 724 Riemenschneider, M. J., Koy, T. H., & Reifenberger, G. (2004). Expression of oligodendrocyte  
725 lineage genes in oligodendroglial and astrocytic gliomas. *Acta Neuropathologica*, 107(3),  
726 277–282. <https://doi.org/10.1007/s00401-003-0809-8>



- 727 Robinson, J. T., Thorvaldsdóttir, H., Winckler, W., Guttman, M., Lander, E. S., Getz, G., &  
728 Mesirov, J. P. (2011). Integrative genomics viewer. *Nature Biotechnology*, 29(1).  
729 <https://doi.org/10.1038/nbt.1754>
- 730 Schindelin, J., Arganda-Carreras, I., Frise, E., Kaynig, V., Longair, M., Pietzsch, T., Preibisch,  
731 S., Rueden, C., Saalfeld, S., Schmid, B., Tinevez, J.-Y., White, D. J., Hartenstein, V.,  
732 Eliceiri, K., Tomancak, P., & Cardona, A. (2012). Fiji: an open-source platform for  
733 biological-image analysis. *Nature Methods*, 9(7). <https://doi.org/10.1038/nmeth.2019>
- 734 Sharma, V. P., Fenwick, A. L., Brockop, M. S., McGowan, S. J., Goos, J. A. C., Hoogeboom,  
735 A. J. M., Brady, A. F., Jeelani, N. O., Lynch, S. A., Mulliken, J. B., Murray, D. J., Phipps,  
736 J. M., Sweeney, E., Tomkins, S. E., Wilson, L. C., Bennett, S., Cornall, R. J., Broxholme,  
737 J., Kanapin, A., ... Wilkie, A. O. M. (2013). Mutations in TCF12, encoding a basic helix-  
738 loop-helix partner of TWIST1, are a frequent cause of coronal craniosynostosis. *Nature*  
739 *Genetics*, 45(3), 304–307. <https://doi.org/10.1038/ng.2531>
- 740 Shen, Z., Lin, Y., Yang, J., Jörg, D. J., Peng, Y., Zhang, X., Xu, Y., Hernandez, L., Ma, J.,  
741 Simons, B. D., & Shi, S.-H. (2021). Distinct progenitor behavior underlying neocortical  
742 gliogenesis related to tumorigenesis. *Cell Reports*, 34(11).  
743 <https://doi.org/10.1016/j.celrep.2021.108853>
- 744 Slomnicki, L. P., Malinowska, A., Kistowski, M., Palusinski, A., Zheng, J.-J., Sepp, M., Timmusk,  
745 T., Dadlez, M., & Hetman, M. (2016). Nucleolar Enrichment of Brain Proteins with Critical  
746 Roles in Human Neurodevelopment. *Molecular & Cellular Proteomics*, 15(6).  
747 <https://doi.org/10.1074/mcp.M115.051920>
- 748 Sock, E., & Wegner, M. (2019). Transcriptional control of myelination and remyelination. *Glia*,  
749 67(11). <https://doi.org/10.1002/glia.23636>
- 750 Srinivas, S., Watanabe, T., Lin, C.-S., William, C. M., Tanabe, Y., Jessell, T. M., & Costantini,  
751 F. (2001). Cre reporter strains produced by targeted insertion of EYFP and ECFP into the  
752 ROSA26 locus. *BMC Developmental Biology*, 1(1). [https://doi.org/10.1186/1471-213X-1-](https://doi.org/10.1186/1471-213X-1-4)  
753 4
- 754 Sugiarto, S., Persson, A. I., Munoz, E. G., Waldhuber, M., Lamagna, C., Andor, N., Hanecker,  
755 P., Ayers-Ringler, J., Phillips, J., Siu, J., Lim, D. A., Vandenberg, S., Stallcup, W., Berger,  
756 M. S., Bergers, G., Weiss, W. A., & Petritsch, C. (2011). Asymmetry-defective  
757 oligodendrocyte progenitors are glioma precursors. *Cancer Cell*, 20(3), 328–340.  
758 <https://doi.org/10.1016/j.ccr.2011.08.011>
- 759 Sussman, C. R., Davies, J. E., & Miller, R. H. (2002). Extracellular and intracellular regulation  
760 of oligodendrocyte development: Roles of Sonic hedgehog and expression of E proteins.  
761 *Glia*, 40(1), 55–64. <https://doi.org/10.1002/glia.10114>
- 762 Suzuki, H., Aoki, K., Chiba, K., Sato, Y., Shiozawa, Y., Shiraiishi, Y., Shimamura, T., Niida, A.,  
763 Motomura, K., Ohka, F., Yamamoto, T., Tanahashi, K., Ranjit, M., Wakabayashi, T.,  
764 Yoshizato, T., Kataoka, K., Yoshida, K., Nagata, Y., Sato-Otsubo, A., ... Ogawa, S.  
765 (2015). Mutational landscape and clonal architecture in grade II and III gliomas. *Nature*  
766 *Genetics*, 47(5), 458–468. <https://doi.org/10.1038/ng.3273>
- 767 Tirosh, I., Venteicher, A. S., Hebert, C., Escalante, L. E., Patel, A. P., Yizhak, K., Fisher, J. M.,  
768 Rodman, C., Mount, C., Filbin, M. G., Neftel, C., Desai, N., Nyman, J., Izar, B., Luo, C.  
769 C., Francis, J. M., Patel, A. A., Onozato, M. L., Riggi, N., ... Suvà, M. L. (2016). Single-  
770 cell RNA-seq supports a developmental hierarchy in human oligodendroglioma. *Nature*.  
771 <https://doi.org/10.1038/nature20123>
- 772 Wedel, M., Fröb, F., Elsesser, O., Wittmann, M. T., Lie, D. C., Reis, A., & Wegner, M. (2020).  
773 Transcription factor Tcf4 is the preferred heterodimerization partner for Olig2 in  
774 oligodendrocytes and required for differentiation. *Nucleic Acids Research*, 48(9), 4839–  
775 4857. <https://doi.org/10.1093/nar/gkaa218>
- 776 Weng, Q., Wang, J., Wang, J., He, D., Cheng, Z., Zhang, F., Verma, R., Xu, L., Dong, X., Liao,  
777 Y., He, X., Potter, A., Zhang, L., Zhao, C., Xin, M., Zhou, Q., Aronow, B. J., Blackshear,  
778 P. J., Rich, J. N., ... Lu, Q. R. (2019). Single-Cell Transcriptomics Uncovers Glial  
779 Progenitor Diversity and Cell Fate Determinants during Development and Gliomagenesis.  
780 *Cell Stem Cell*, 24(5), 707-723.e8. <https://doi.org/10.1016/j.stem.2019.03.006>
- 781 Wojciechowski, J., Lai, A., Kondo, M., & Zhuang, Y. (2007). E2A and HEB are required to block  
782 thymocyte proliferation prior to pre-TCR expression. *Journal of Immunology (Baltimore,*  
783 *Md. : 1950)*, 178(9), 5717–5726. <http://www.ncbi.nlm.nih.gov/pubmed/17442955>
- 784 Yi, S., Huang, X., Zhou, S., Zhou, Y., Anderson, M. K., Zúñiga-Pflücker, J. C., Luan, Q., & Li,  
785 Y. (2020). E2A regulates neural ectoderm fate specification in human embryonic stem  
786 cells. *Development*. <https://doi.org/10.1242/dev.190298>

- 787 Yi, S., Yu, M., Yang, S., Miron, R. J., & Zhang, Y. (2017). Tcf12, A Member of Basic Helix-Loop-  
788 Helix Transcription Factors, Mediates Bone Marrow Mesenchymal Stem Cell Osteogenic  
789 Differentiation In Vitro and In Vivo. *Stem Cells*. <https://doi.org/10.1002/stem.2491>  
790 Yoon, S. J., Foley, J. W., & Baker, J. C. (2015). HEB associates with PRC2 and SMAD2/3 to  
791 regulate developmental fates. *Nature Communications*, 6(1), 1–12.  
792 <https://doi.org/10.1038/ncomms7546>  
793 Zhang, Y., Chen, K., Sloan, S. A., Bennett, M. L., Scholze, A. R., O’Keeffe, S., Phatnani, H. P.,  
794 Guarnieri, P., Caneda, C., Ruderisch, N., Deng, S., Liddelow, S. A., Zhang, C., Daneman,  
795 R., Maniatis, T., Barres, B. A., & Wu, J. Q. (2014). An RNA-sequencing transcriptome and  
796 splicing database of glia, neurons, and vascular cells of the cerebral cortex. *Journal of*  
797 *Neuroscience*, 34(36), 11929–11947. <https://doi.org/10.1523/JNEUROSCI.1860-14.2014>  
798 Zhu, G., Yang, S., Wang, R., Lei, J., Ji, P., Wang, J., Tao, K., Yang, C., Ge, S., & Wang, L.  
799 (2021). P53/mir-154 pathway regulates the epithelial-mesenchymal transition in  
800 glioblastoma multiforme cells by targeting tcf12. *Neuropsychiatric Disease and Treatment*,  
801 17, 681–693. <https://doi.org/10.2147/NDT.S273578>  
802 Zhuang, Y., Barndt, R. J., Pan, L., Kelley, R., & Dai, M. (1998). Functional replacement of the  
803 mouse E2A gene with a human HEB cDNA. *Molecular and Cellular Biology*, 18(6), 3340–  
804 3349. <https://doi.org/10.1128/mcb.18.6.3340>  
805

## 806 Data Availability Statement

807 ChIPseq and RNAseq data generated in this study are available through the Gene  
808 Expression Omnibus (*data will be deposited upon acceptance of the manuscript*). The  
809 data that support the findings of this study are available from the corresponding author  
810 upon reasonable request.

## 811 Figure Legends

812 [Figure 1: TCF12 is altered in gliomas.](#)

813 **A.** Bar graph showing the percentage of *TCF12* altered samples in the glioblastoma  
814 (GBM, 592 samples) and lower grade glioma (LGG, 514 samples) cohorts from The  
815 Cancer Genome Atlas (TCGA). **B.** Pie charts illustrating the types of alterations in  
816 *TCF12* altered gliomas of Figure 1A. **C-D.** Kaplan-Meier survival curves of TCGA  
817 LGGs (n=77 altered, n=418 non altered, C) and GBMs (n=95 altered, n=263 non  
818 altered, D) comparing *TCF12* altered vs non altered groups. **E-F.** Kaplan-Meier survival  
819 curves of TCGA LGGs (n=154 high, n=359 low, E) and GBMs (n=46 high, n=106 low,  
820 E) comparing high or low *TCF12* mRNA expression.

821

822 [Supplementary Figure 1 \(related to Figure 1\)](#)

823 **A.** OncoPrint showing *TCF12* alterations along with other genes commonly altered in  
824 gliomas (TCGA GBM/LGG cohort). Each column represents one sample. Only the  
825 *TCF12* altered samples (210/1106) are displayed. The cumulative frequency of  
826 alterations of each gene observed in the total number of patient samples is indicated.  
827 **B.** Chart summarizing the estimated co-occurrence of *TCF12* alterations with genes  
828 commonly altered in gliomas (from Supplementary Figure 1A). Statistical significance  
829 was determined with Fisher’s exact test. Analysis was performed using the “Mutual  
830 Exclusivity” tool by “cbioportal”.

831

832 [Figure 2: TCF12 is expressed in oligodendroglial cells](#)

833 **A.** Bar graphs showing the expression of *TCF12* mRNA in astrocytes, neurons and  
834 oligodendroglial cells in mouse (top) and human (bottom) brain (data extracted from  
835 <https://www.brainrnaseq.org/>) **B.** Reconstructed UMAP representation illustrating  
836 *Tcf12* expression across oligodendroglia differentiation (direction of differentiation  
837 indicated by the arrow, yellow = low expression and dark blue = high expression,  
838 related to Supplementary Figure 2 A-B). **C.** Dot plot showing mean *Tcf12* expression  
839 and the percentage of *Tcf12*-expressing cells in each cluster shown in Supplementary  
840 Figure 2B. **D.** Schematic representation of the expression of selected OPC and OL  
841 markers (according to (Nakatani et al., 2013)). **E-F.** Immunostaining of TCF12 with  
842 PDGFRa (OPCs, E) or CC1 and OLIG1 (OLs, F) in the corpus callosum of postnatal  
843 (P15) and adult (P60) wild type mice. Scale bars, 20µm. Insets represent 60%  
844 magnifications of the cells highlighted dash-lined squares. OPCs = oligodendrocyte  
845 precursor cells, OLs = oligodendrocytes.

846

847 [Supplementary Figure 2 \(related to Figure 2\)](#)

848 **A.** UMAP representing the compilation of the two single cell RNA-Seq data sets by  
849 Marques *et al* 2016 & 2018. **B.** UMAP with colored dots representing the 9 stages of  
850 differentiation (simplified clusters), from neural stem cells to mature myelinating  
851 oligodendrocytes. **C.** Dot plot summarizing the average mRNA expression of the three  
852 E proteins (*Tcf12*, *Tcf3* and *Tcf4*) and the percentage of expressing cells in each one  
853 of the clusters of the Supplementary Figure 2B.

854

855 [Figure 3: TCF12 mainly occupies active promoter regions in oligodendroglial cells](#)

856 **A.** Venn diagrams illustrating the overlap of TCF12 bound sites and genes in NPCs  
857 and OPCs/OLs. **B.** Graphs depicting the annotation of TCF12 bound sites in NPCs  
858 (middle) and OPCs/OLs (right) with genomic regions compared to the region  
859 representation in the genome (left). **C.** Graphs showing the number of correlations of  
860 TCF12 peaks in NPCs (purple line) and OPCs/OLs (blue line) compared the central  
861 position of promoter (left) and enhancer (right) regions. **D.** Pie charts showing the  
862 distribution of TCF12 bound sites in promoter (left) and enhancer (right) regions in  
863 OPCs/OLs in association with epigenetic marks: H3K4me3 and H3K27Ac = active,  
864 H3K4me = poised, H3K27me3= repressed, NA=no epigenetic mark. **E.** Representative  
865 ChIP-Seq tracks for TCF12, input control and active epigenetic marks (H3K4me3 and  
866 H3K27Ac) in *Pdgfra*, *Itpr2*, *Mbp*, *Ki67* and *Cdkn1a* in promoter regions in OPCs/OLs.  
867 **F.** Bar plots showing significantly enriched terms and pathways in the TCF12 bound  
868 genes with active promoters in OPCs/OLs (6596 genes). For the  
869 “MSigDB\_Hallmark\_2020” library, the top 15 most significant gene sets are displayed.  
870 For the “GO\_Biological\_Process\_2021” library, 15 among the top 50 most significant  
871 gene sets are displayed.

872

873 [Supplementary Figure 3 \(related to Figure 3\)](#)

874 **A.** Scheme illustrating the experimental strategy for the ChIP-Seq experiments. **B.**  
875 Quantification of PDGFRa+ and CNP+ cells (as percentage of the total cells) of the

876 immunofluorescence immunocytochemistry of cells that were plated directly after the  
877 MACSorting and kept in culture for 2 hours. PDGFRa+ cells are OPCs. CNP+ cells are  
878 mostly OLs (with some OPCs expressing CNP). Data are presented as mean + SEM.  
879 Individual points correspond to individual animals (n=6 wild type mice). **C.** Pie charts  
880 showing the distribution of TCF12-bound sites between promoter (left) and enhancer  
881 (right) regions in NPCs and in association with epigenetic marks (H3K4me3 and  
882 H3K27Ac = active, H3K4me = poised, H3K27me3= repressed; NA= no epigenetic  
883 mark). **E.** Selected ChIP-Seq tracks for TCF12, input control and epigenetic marks in  
884 promoter regions of *Mycn*, *Myc*, *Rpl5*, *Ruvbl2*, *Fbl* in OPCs/OLs.

885

886 **Figure 4: TCF12 inactivation in OPCs in vivo results in proliferation defects**

887 **A.** Schematic representation of the experimental procedure and timeline. **B-C.**  
888 Immunostaining of YFP (recognized by an anti-GFP antibody), with PDGFRa and Ki67  
889 (B) or CC1 and OLIG1 (C) in the corpus callosum of tamoxifen induced *Tcf12<sup>ctrl</sup>* and  
890 *Tcf12<sup>hom</sup>* pups at P16. Scale bars, 20µm. In B, open arrowheads show recombined  
891 proliferating OPCs (PDGFRa+ Ki67+ GFP+) and white arrowheads show non  
892 proliferating recombined OPCs (PDGFRa+ Ki67- GFP+). In C, white arrows show  
893 recombined early OLs (CC1+ OLIG1- GFP+) and white arrowheads show recombined  
894 OPCs (CC1- OLIG1+ GFP+). **D-I** Quantification of the different populations within the  
895 recombined cells (GFP+) in P16 *Tcf12<sup>ctrl</sup>*, *Tcf12<sup>het</sup>* and *Tcf12<sup>hom</sup>* tamoxifen induced  
896 pups. Individual points represent individual animals (n=6 *Tcf12<sup>ctrl</sup>*, n=6 *Tcf12<sup>het</sup>* and n=5  
897 *Tcf12<sup>hom</sup>*). Data are presented as mean + SEM. Statistical differences were evaluated  
898 with one-way ANOVA and p-values (when differences are significant) are given on the  
899 graphs.

900

901 **Supplementary Figure 4 (related to Figure 4)**

902 **A.** Illustration of the genetics of the mouse lines used to create the *Pdgfra-CreERT<sup>T</sup>*;  
903 *Rosa26<sup>LSL-YFP</sup>*; *Tcf12<sup>flox</sup>* mice. **B.** Genetics of the animals used for the experiments. **C.**  
904 Experimental procedure for the validation of the mouse model. **D.** RT-qPCR analysis  
905 of *Tcf12* expression in O4+ MACSorted cells from P16 *Tcf12<sup>ctrl</sup>*, *Tcf12<sup>het</sup>* and *Tcf12<sup>hom</sup>*  
906 induced pups. Individual points correspond to individual animals (n=3 *Tcf12<sup>ctrl</sup>*, n=3  
907 *Tcf12<sup>het</sup>* and n=4 *Tcf12<sup>hom</sup>*). Data are presented as mean + SEM. Individual points  
908 represent individual animals. Statistical differences were evaluated with one-way  
909 ANOVA and p-values are given on the graphs. **E.** Quantification of GFP+, PDGFRa+  
910 and OLIG2+ cells plated directly after the MACSorting and kept in culture for 2 hours.  
911 GFP+ cells are considered as recombined cells. PDGFRa+ cells are OPCs. OLIG2+  
912 cells correspond to OPCs and OLs. Data are presented as mean + SEM. Individual  
913 points correspond to individual animals (n=4 *Tcf12<sup>ctrl</sup>*, n=3 *Tcf12<sup>het</sup>* and n=3 *Tcf12<sup>hom</sup>*).  
914 Differences were analyzed with two-way (% total cells) or one-way (% recombined  
915 cells) ANOVA. No statistically significant differences were noted. **F.** Schematic  
916 representation of the experimental procedure and timeline for the P23 timepoint. **G-H.**  
917 Immunostaining of YFP (recognized by an anti-GFP antibody), with PDGFRa and Ki67  
918 (B) or CC1 and OLIG1 (C) in the corpus callosum of tamoxifen induced *Tcf12<sup>ctrl</sup>* and  
919 *Tcf12<sup>hom</sup>* pups (P23). Scale bars, 20µm. B: open arrowheads show recombined

920 proliferating OPCs (PDGFRa+ Ki67+ GFP+) and white arrowheads show non  
921 proliferating recombined OPCs (PDGFRa+ Ki67- GFP+). C: white arrows show  
922 recombined OLs (CC1+ OLIG1+ GFP+) and white arrowheads show recombined  
923 OPCs (CC1- OLIG1+ GFP+). **I-N.** Quantification of the different populations within the  
924 recombined cells (GFP+) in P23 *Tcf12<sup>ctrl</sup>*, *Tcf12<sup>het</sup>* and *Tcf12<sup>hom</sup>* tamoxifen induced  
925 pups. Data are presented as mean + SEM. Individual points represent individual  
926 animals (animals quantified I-K: n=5 *Tcf12<sup>ctrl</sup>*, n=5 *Tcf12<sup>het</sup>* and n=4 *Tcf12<sup>hom</sup>*, animals  
927 quantified L-N: n=4 *Tcf12<sup>ctrl</sup>*, n=4 *Tcf12<sup>het</sup>* and n=4 *Tcf12<sup>hom</sup>*). Statistical differences  
928 were evaluated with one-way ANOVA. No statistically significant differences were  
929 noted.

930

931 [Figure 5: Transcriptomic analyses of \*Tcf12\* inactivated cells highlight defects in OPC](#)  
932 [proliferation, differentiation, and cancer-related pathways that are conserved in human](#)  
933 [gliomas.](#)

934 **A.** Scheme illustrating the experimental strategy for the RNA-Seq experiments. **B-C.**  
935 Gene Set Enrichment Analysis (GSEA) of *Tcf12<sup>hom</sup>* vs *Tcf12<sup>ctrl</sup>* O4+ cells (OPCs/OLs)  
936 using curated oligodendroglial signatures (B) and MSigDB HALLMARKS gene sets  
937 (C). **D.** GSEA plots of selected gene sets of KEGG, HALLMARKS and REACTOME  
938 collections, comparing *Tcf12<sup>hom</sup>* vs *Tcf12<sup>ctrl</sup>* animals. **E.** Gene Set Enrichment Analysis  
939 (GSEA) of oligodendrogliomas altered for *TCF12* (*TCF12<sup>ALTERED</sup>* hODG, n=20)  
940 compared to non-altered oligodendrogliomas (*TCF12<sup>WT</sup>* hODG, n=35) showing all  
941 significantly enriched gene sets of HALLMARK MSigDB collection. **F.** GSEA plots of  
942 selected gene sets for the REACTOME collection comparing *TCF12<sup>ALTERED</sup>* vs  
943 *TCF12<sup>WT</sup>* hODG.

944

945 [Supplementary Figure 5 \(related to Figure 5\)](#)

946 **A-B.** Gene Set Enrichment Analysis (GSEA) of *Tcf12<sup>het</sup>* vs *Tcf12<sup>ctrl</sup>* O4+ cells  
947 (OPCs/OLs) using curated oligodendroglial signatures (A) and MSigDB HALLMARKS  
948 gene sets (B). **C.** Bar plots of GSEA normalized enrichment score (NES) of selected  
949 gene sets (positively and negatively enriched) from the GO\_Biological\_Process,  
950 KEGG and REACTOME collections of the MSigDB, comparing *Tcf12<sup>hom</sup>* vs *Tcf12<sup>ctrl</sup>*  
951 animals. Adjusted p-values are given on the corresponding bars.

**Figure 1**

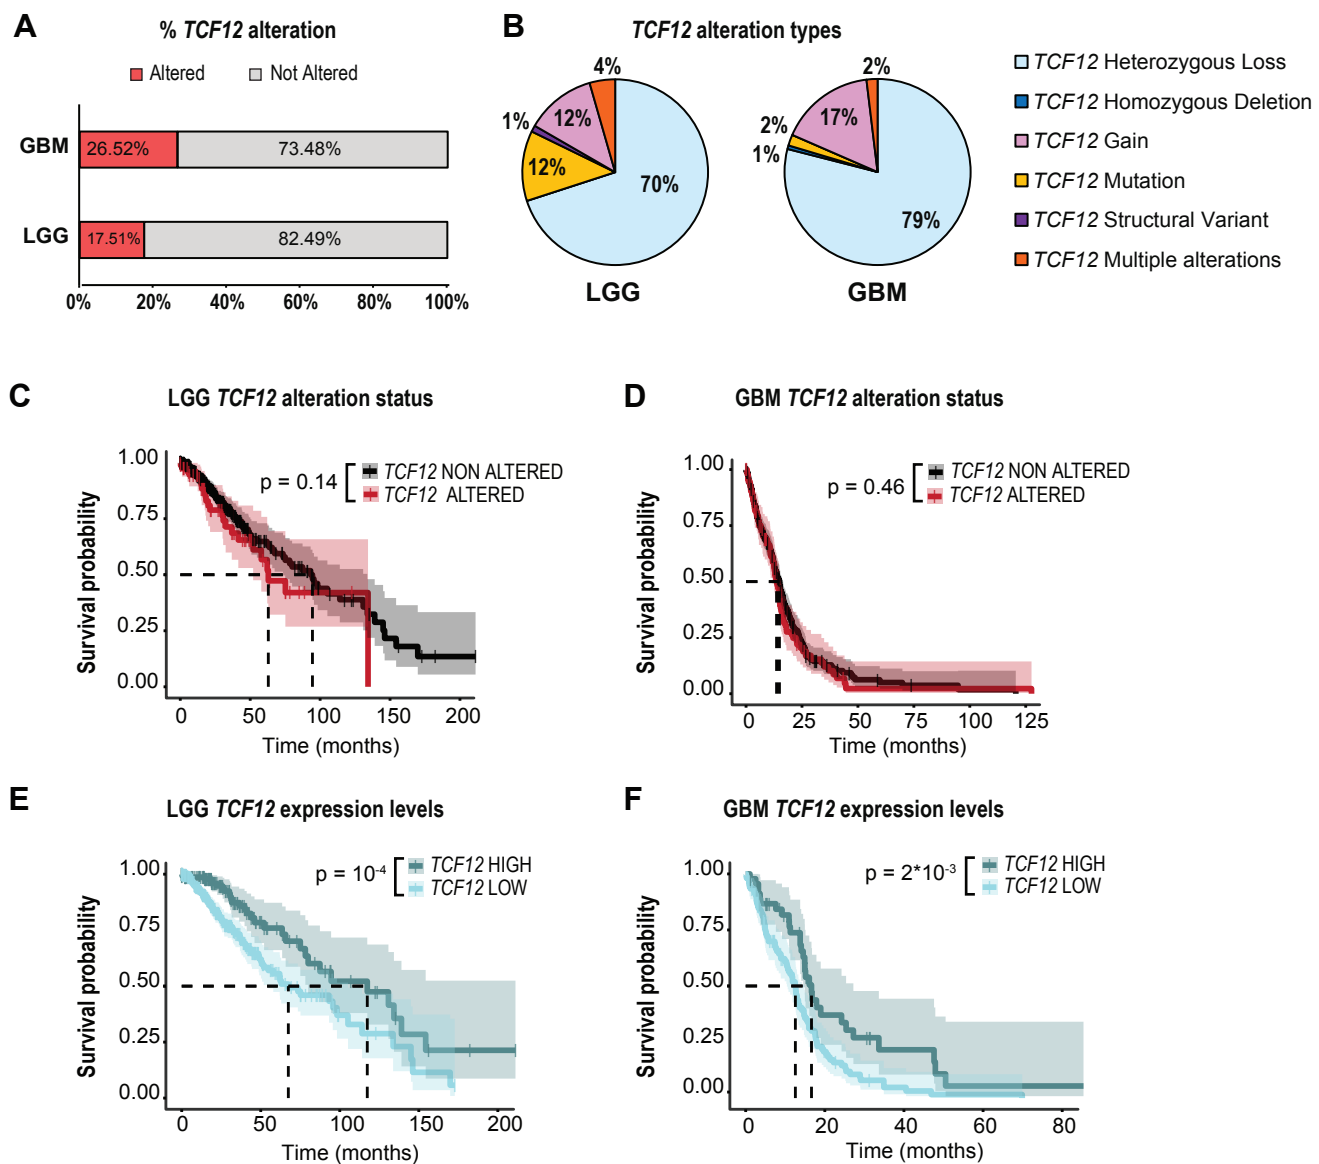

**Figure 2**

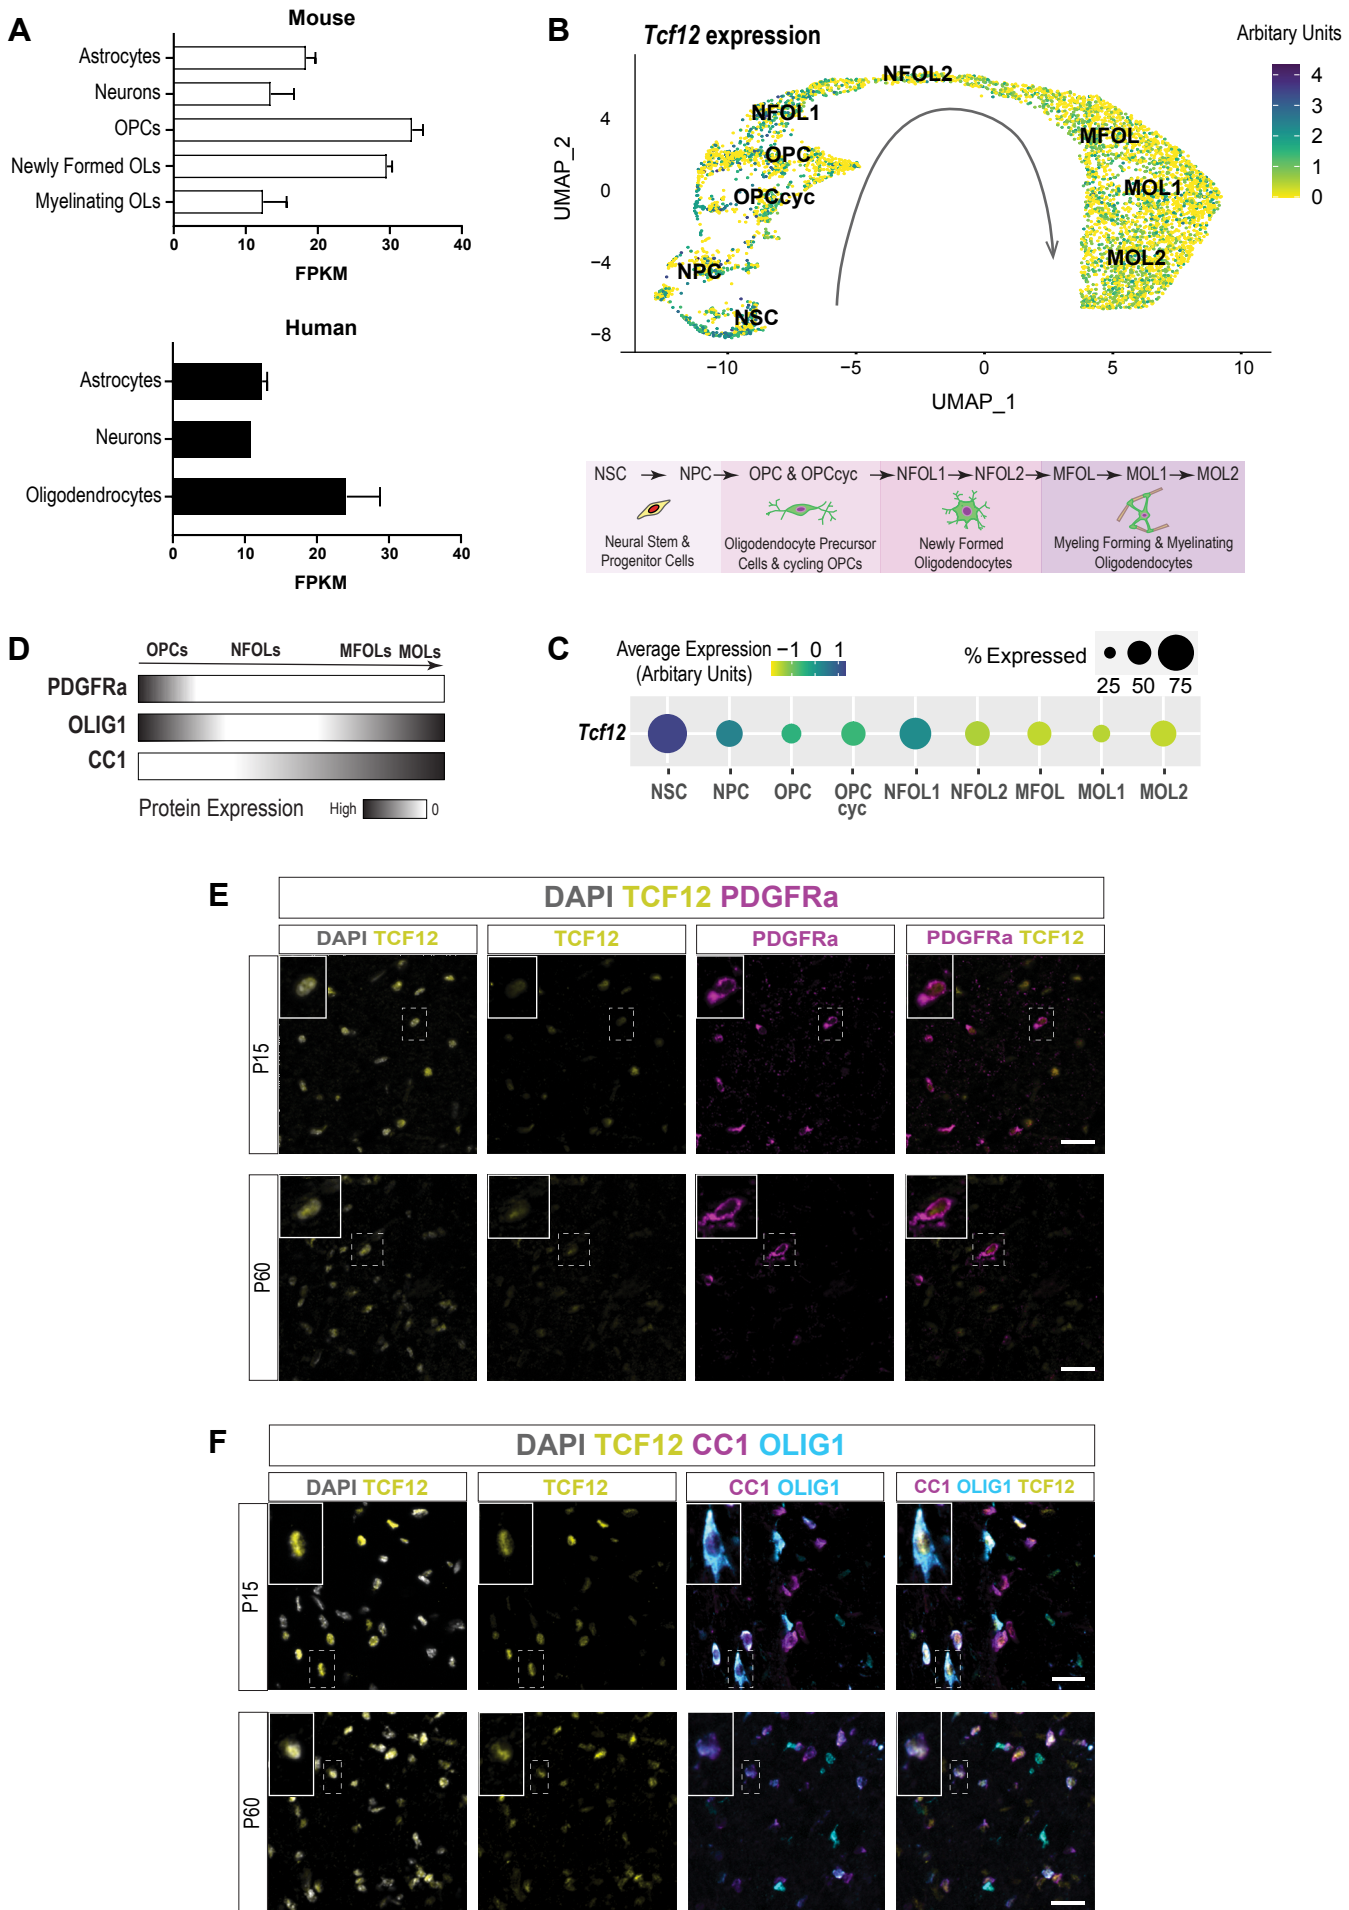

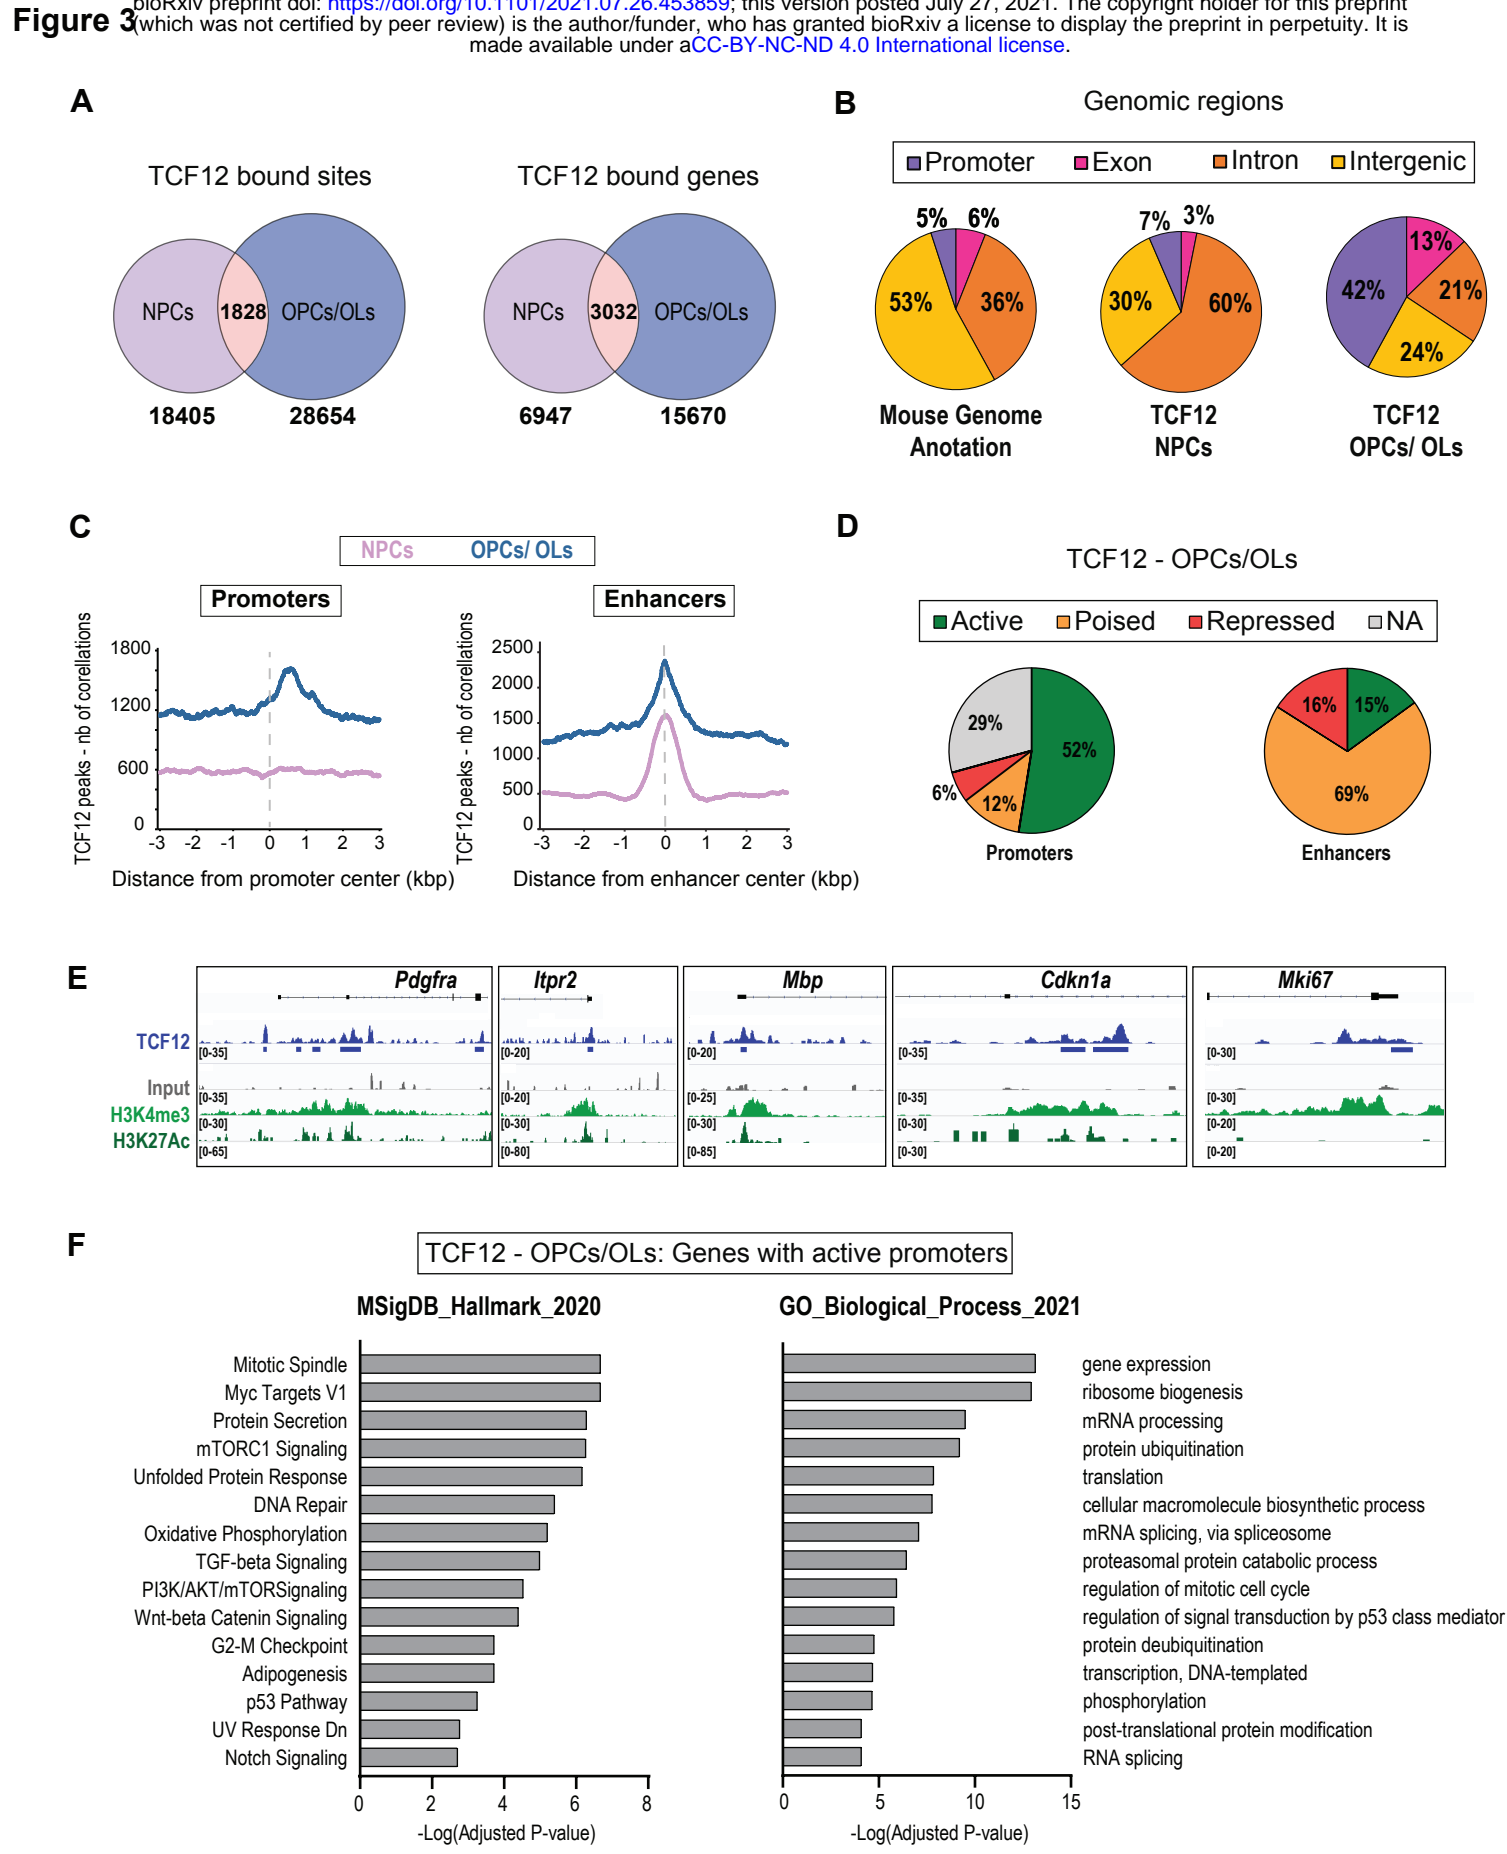



**Figure 4**

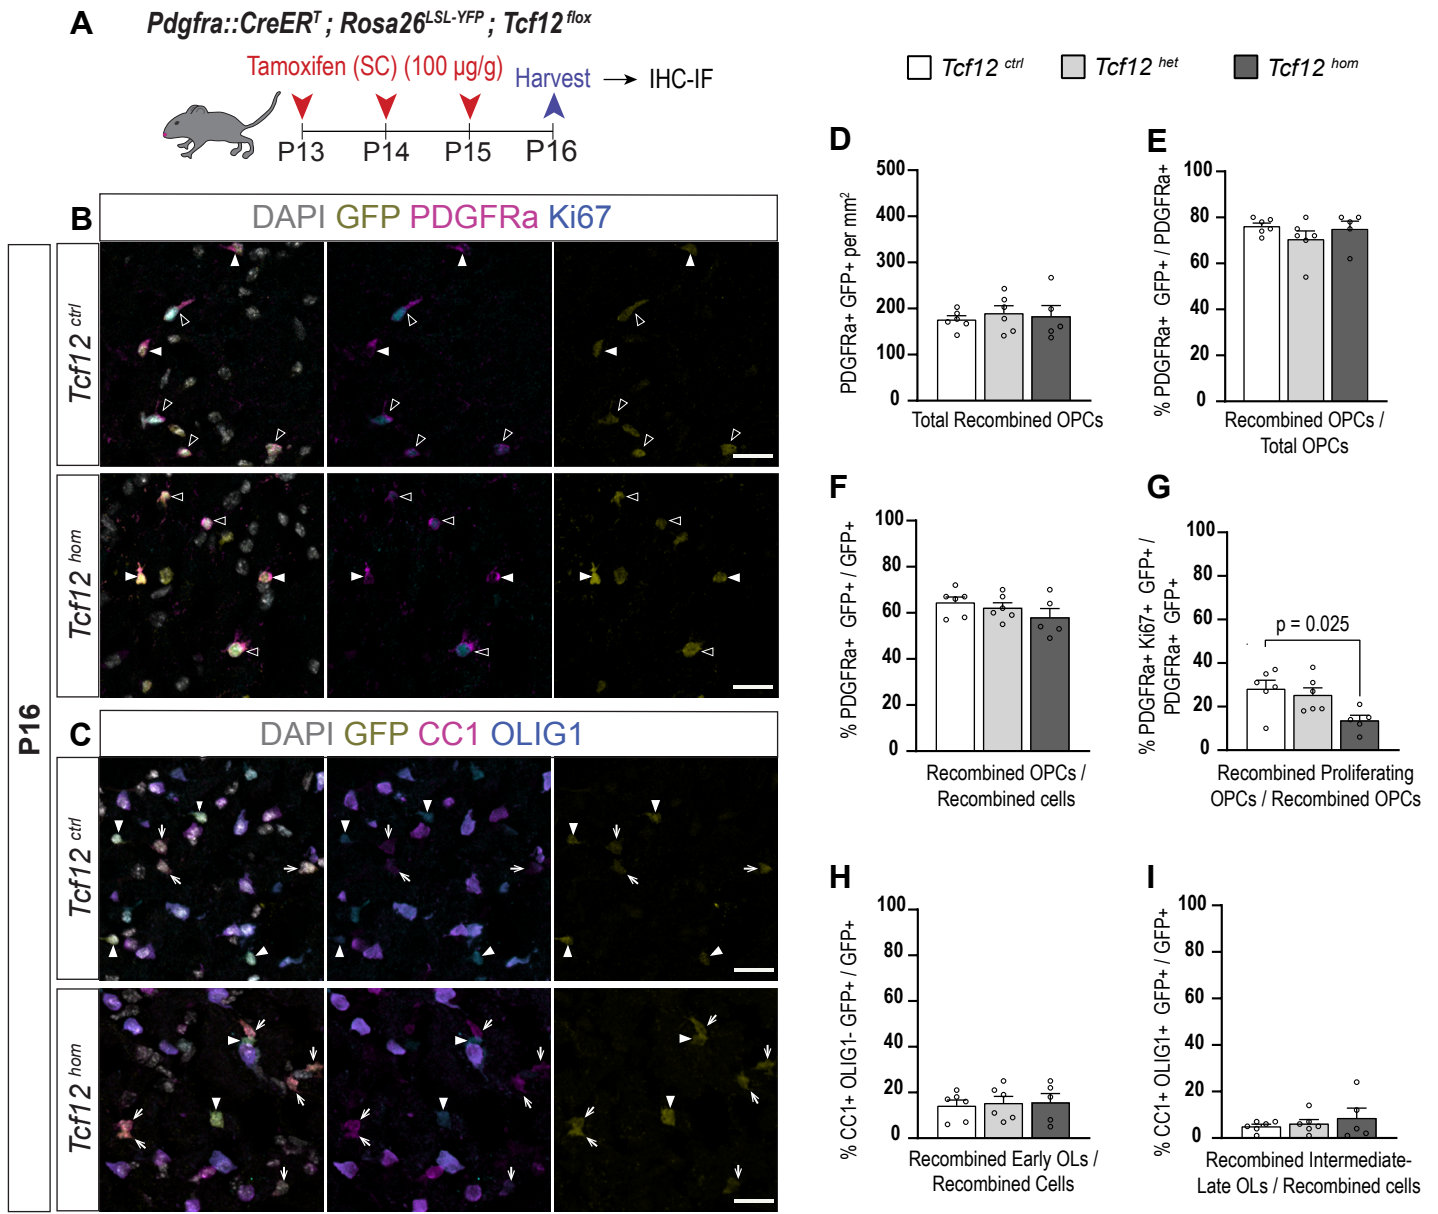

## Figure 5

**A**

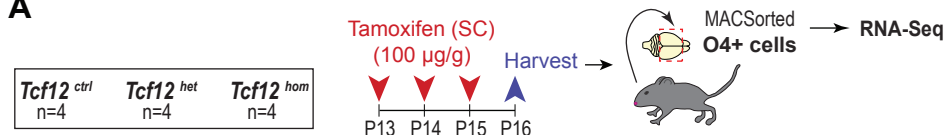

**B**

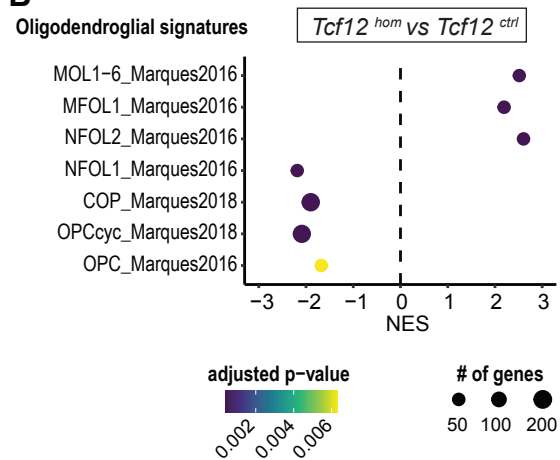

**C**

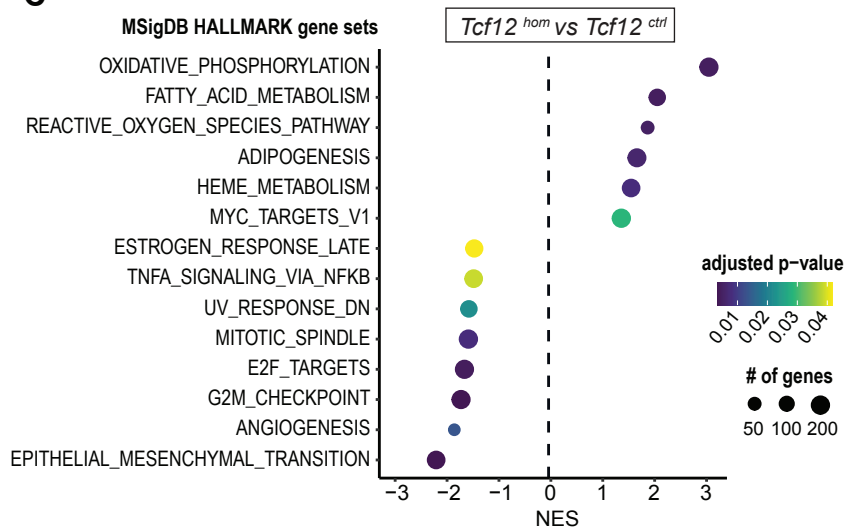

**D** *Tcf12<sup>hom</sup> vs Tcf12<sup>ctrl</sup>*

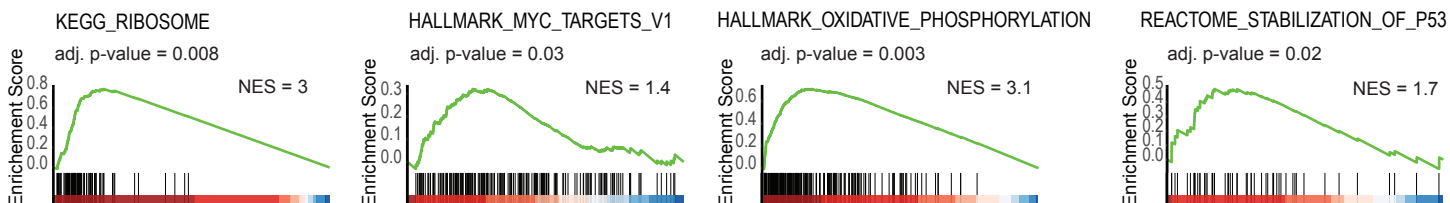

**E**

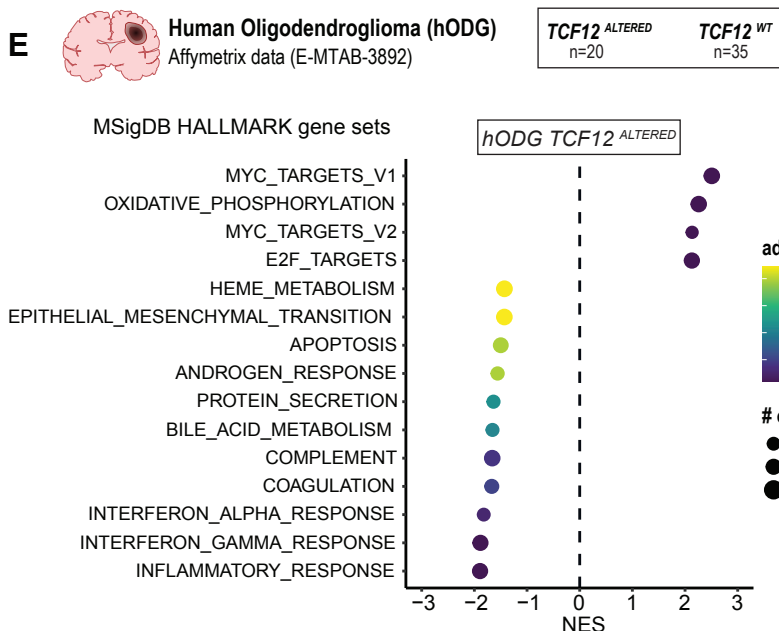

**F** *hODG TCF12<sup>ALTERED</sup> vs hODG TCF12<sup>WT</sup>*

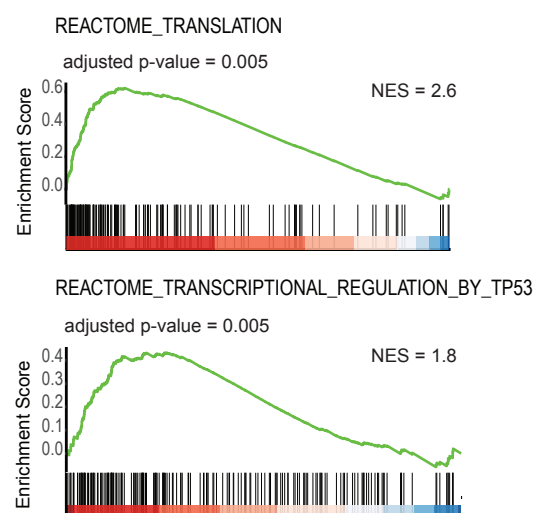

Source: http://biorxiv.org/content/10.1101/2021.07.26.453859v1.full.pdf
